# Supplementary material for: Structural and mechanistic basis for redox sensing by the cyanobacterial transcription regulator RexT
Source: PubMed Central journal article supplement (PMC8960804; doi:10.1038/s42003-022-03226-x), 2022-03-28
Supplement: 42003_2022_3226_MOESM2_ESM.pdf [file 42003_2022_3226_MOESM2_ESM.pdf]

# Structural and Mechanistic Basis for Redox Sensing by the Cyanobacterial Transcription Regulator RexT

Bin Li<sup>1</sup>, Minshik Jo<sup>1</sup>, Jianxin Liu<sup>1</sup>, Jiayi Tian<sup>1</sup>, Robert Canfield<sup>1-2</sup>, and Jennifer Bridwell-Rabb<sup>1</sup>

Corresponding Author: [jebridwe@umich.edu](mailto:jebridwe@umich.edu)

<sup>1</sup>Department of Chemistry, University of Michigan, Ann Arbor, MI 48109

<sup>2</sup>Current Address: Department of Microbiology and Immunology, University of Colorado Anschutz Medical Campus, Aurora, CO 80045

## **Supplementary Figures and Tables:**

**Supplementary Fig. 1.** RexT is a dimer.

**Supplementary Fig. 2.** Structure comparison of RexT with ArsR-SmtB superfamily members.

**Supplementary Fig. 3.** The ability of RexT to bind DNA is not impacted by the presence of metal ions.

**Supplementary Fig. 4.** RexT resembles the ArsR-SmtB protein NalR.

**Supplementary Fig. 5.** An electrophoretic mobility shift assay for RexT and its variants allows for probing interaction with DNA.

**Supplementary Fig. 6.** Two chloride ions serve as a mimic of the DNA backbone in the crystal structure of RexT.

**Supplementary Fig. 7.** Mass spectrometry reveals key insights into disulfide bond formation.

**Supplementary Fig. 8.** Circular dichroism experiments reveal a similar architecture in the presence and absence of H<sub>2</sub>O<sub>2</sub>.

**Supplementary Fig. 9.** Crystal packing likely prevents disulfide bond formation in chain A.

**Supplementary Fig. 10.** A significant conformational change occurs in the RexT structure following oxidation.

**Supplementary Fig. 11.** The structure of RexT reveals key structural features for responding to H<sub>2</sub>O<sub>2</sub>.

**Supplementary Fig. 12.** The HTH ArsR-SmtB-type DNA-binding domain and related protein families were used to generate a sequence similarity network (SSN).

**Supplementary Fig. 13.** Sequence alignment of previously characterized members of ArsR-SmtB family.

**Supplementary Fig. 14.** The sub-sequence similarity network with genomic neighborhood information annotated for the RexT cluster.

**Supplementary Fig. 15.** Sequence alignment of RexT homologs reveals complete conservation of Cys41.

**Supplementary Fig. 16.** A rooted phylogenetic tree for RexT homologs from three orders of Cyanobacteria.

**Supplementary Fig. 17:** Alignment of RexT with CyeR shows conservation of Cys41.

**Supplementary Fig. 18.** Comparison of RexT with other ArsR-SmtB members in different states suggests possible mechanism of regulation.

**Supplementary Table 1.** The sequence of DNA duplex probe used for EMSA.

**Supplementary Table 2.** Binding constants of RexT and its variants to DNA duplex fluorescence probe.

**Supplementary Table 3.** Primers used for mutagenesis.

**Supplementary Table 4.** Key ArsR-SmtB members highlighted in the sequence similarity network.

**Supplementary Table 5.** 105 sequences of RexT-like regulators that control Trx expression.

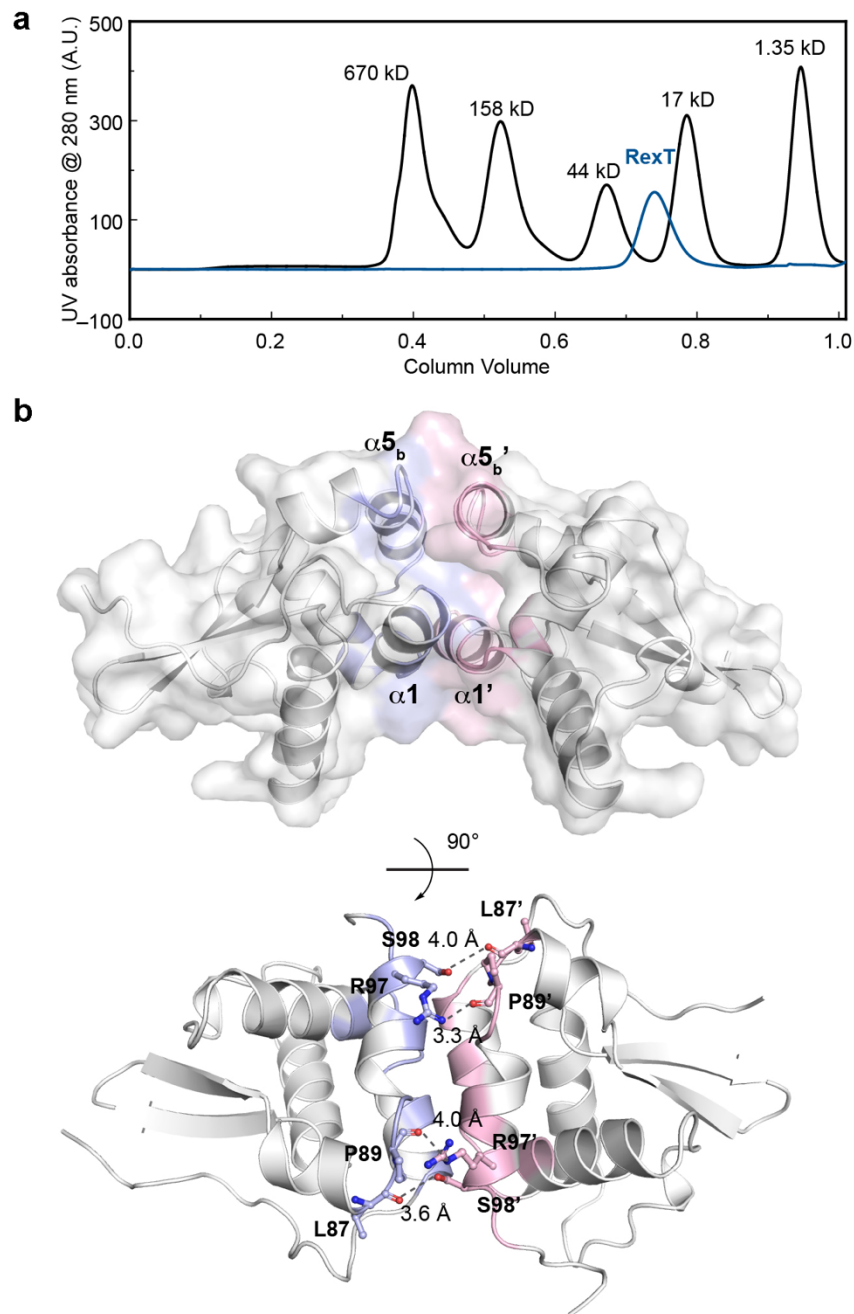

**Supplementary Fig. 1. RexT is a dimer.** (a) Size exclusion chromatography shows that RexT exists in a dimeric form in solution. The protein standard (Bio-Rad) contains thyroglobin (670 kD),  $\gamma$ -globin (158 kD), ovalbumin (44 kD), myoglobin (17 kD) and vitamin B12 (1.35 kD). Tag-free RexT based on our purification protocol after TEV-cleavage has a calculated monomeric molecular weight of 12.8 kD based on the amino acid sequence. RexT elutes between ovalbumin and myoglobin, suggesting that it exists in a dimeric form (25.6 kD as a dimer). (b) The dimer interface of RexT is made up by the coiled-coil interaction between the  $\alpha 1$  helices, and between the  $\alpha 5_b$  helices. The interacting residues are identified by the ePISA server<sup>1</sup> and are colored in light blue on chain A and light pink on chain B. The interacting residues are Leu14, Pro15, Leu18, Tyr19, Leu21, Gly22, Asp23, Pro24, Arg26 and Leu27 on the  $\alpha 1$  helix and Leu87, Phe88, Pro89, Gly90, Leu91, Ala94, Val95, Arg97, Ser98, Ala99, Gln100 on the  $\alpha 5_b$  helix. Polar interactions at the dimeric interface are indicated with dashed lines and the distances are labeled.

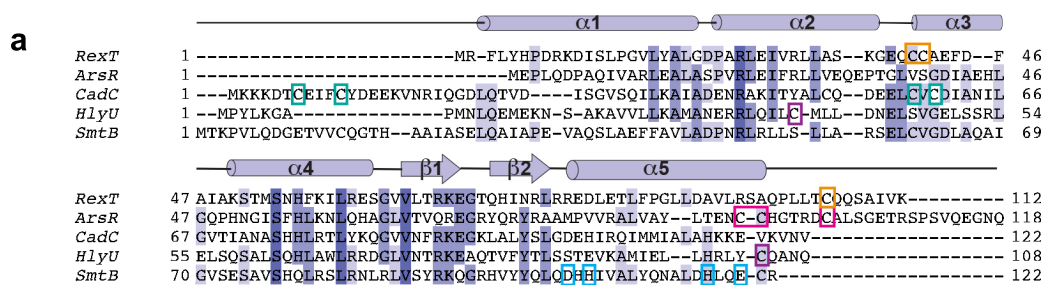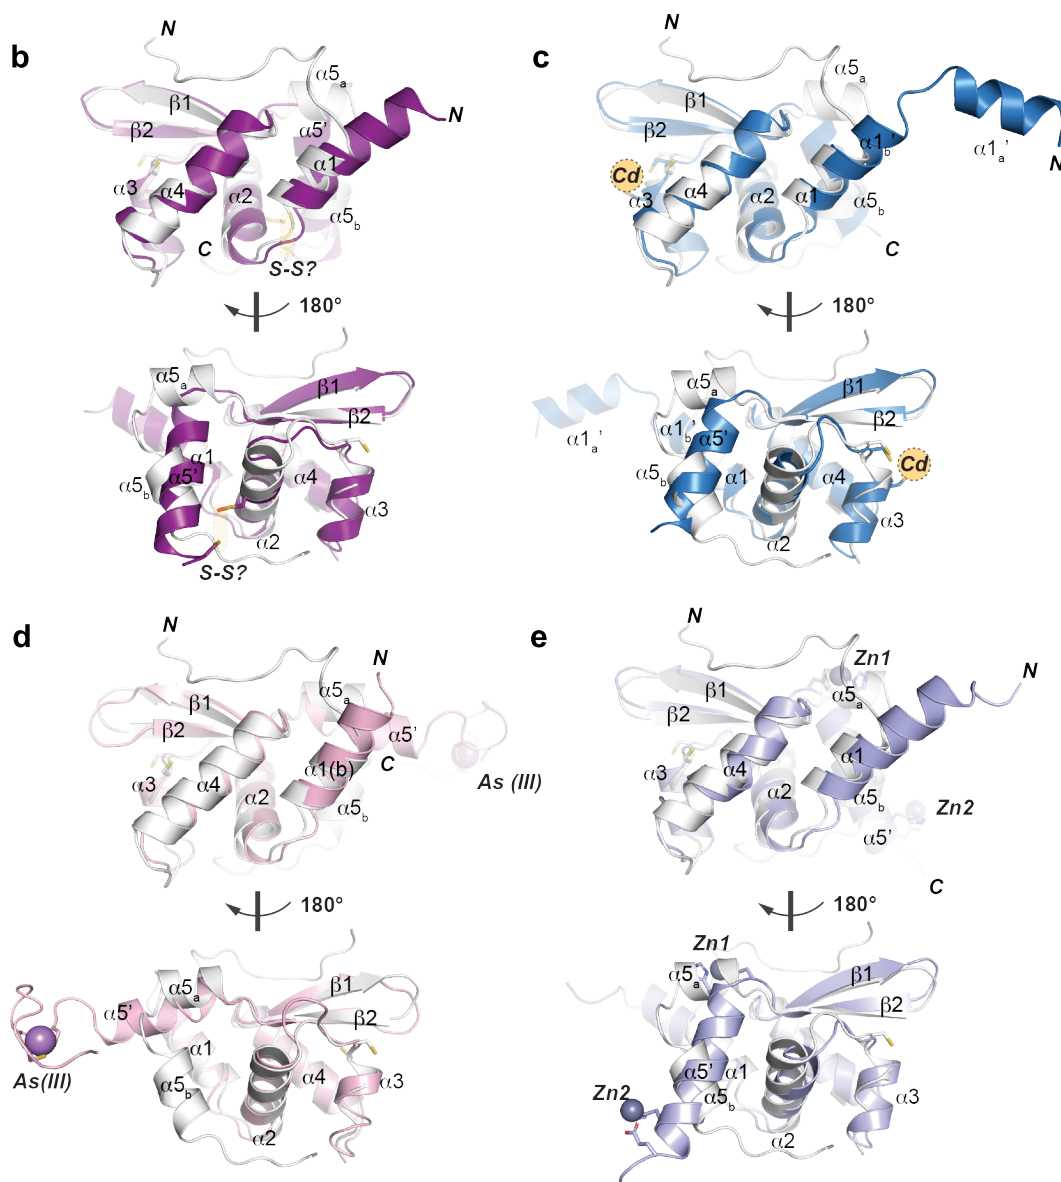

**Supplementary Fig. 2. Structure comparison of RexT with ArsR-SmtB superfamily members.** (a) Sequence alignment of four ArsR-SmtB transcription factors identified by the Dali server<sup>2</sup> with RexT shows a well conserved wHTH architecture. Secondary structure labeling is based on the consensus. Colored boxes highlight functional residues that could bind an environmental stimulator, such as a metal ion (green and blue), an arsenite ion (pink), form a disulfide bond in RexT (orange), or an unknown species (purple). (b) RexT (gray) is overlaid with VcHlyU<sup>3</sup> (PDB ID: 4K2E, purple). In VcHlyU Cys38 on the  $\alpha 2$  helix is in the sulfenic acid form and is pointing towards Cys104, suggesting that disulfide bond formation may be important to regulation. The root mean squared deviation (rmsd) is 1.82 Å over 396 atoms. (c) RexT (gray) is overlaid with SaCadC<sup>4</sup> (PDB ID: 1U2W, blue). SaCadC uses a regulatory cadmium site (dashed circle).

The rmsd is 1.45 Å over 404 atoms. (d) RexT (gray) is overlaid with *Af*ArsR<sup>5</sup> (PDB ID: 6J05, pink). *Af*ArsR uses three Cys residues on the C-terminus to bind As<sup>3+</sup> (purple sphere). The rmsd is 1.33 Å over 365 atoms. (e) RexT (gray) is overlaid with *Se*SmtB<sup>6</sup> (PDB ID: 1R22, light purple). In this protein, two Zn<sup>2+</sup> (gray sphere) ions at the dimer interface are found coordinated to Asp and His residues from the α5 helix of one subunit, and His and Glu residues from the other subunit (only a monomer is shown here). The rmsd is 2.05 Å over 426 atoms. In all panels, the overlay of RexT was performed in COOT<sup>7</sup> using the SSM superimpose feature to align the models based on Cα positions and visualized by PyMOL. *Af*, *Acidithiobacillus ferrooxidans*; *Se*, *Synechococcus elongatus* PCC 7942; *Sa*, *Staphylococcus aureus*; *Vc*, *Vibrio cholerae*.

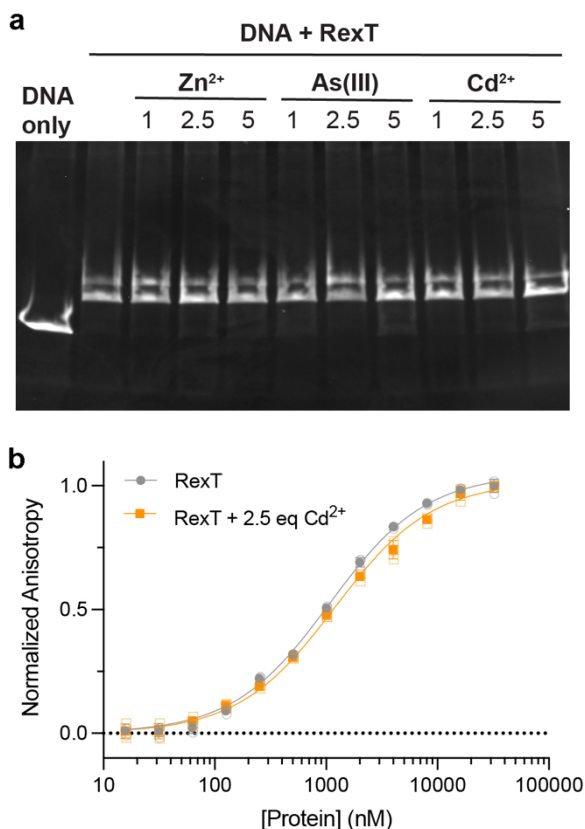

**Supplementary Fig. 3. The ability of RexT to bind DNA is not impacted by the presence of metal ions.** (a) A DNA probe (20 nM) was incubated with RexT (100 nM) and 1, 2.5, or 5 equivalents of As(III), Cd<sup>2+</sup>, and Zn<sup>2+</sup>. This electrophoretic mobility shift assay (EMSA) showed that RexT binds to DNA similarly in the absence (lane 2) and presence of the different tested metal ions (lanes 3-11). (b) A labeled DNA probe shows changes in fluorescence anisotropy following the addition of RexT. These differences allowed for calculation of the  $K_d$  for RexT in the presence (orange) and absence (gray) of Cd<sup>2+</sup> (see Supplementary Table 2). As shown in panel A, adding a metal ion to RexT in a 2.5-fold excess does not markedly change its ability to bind DNA. Each data point for the experiments is shown as an open shape. In panel b, data was measured using  $n=3$  independent experiments and is presented with the individual measurements (open shapes) and as the mean value of these measurements  $\pm$  SD (closed shapes). Source data are provided as a Source Data file.

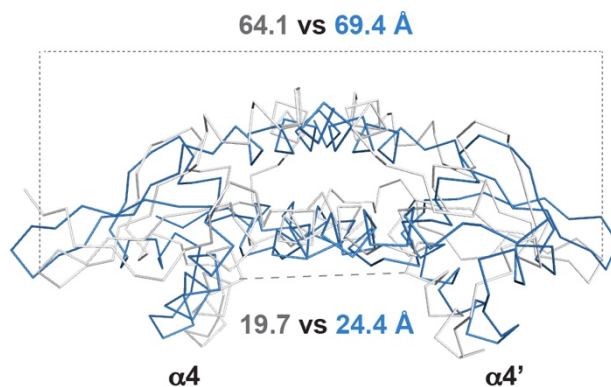

**Supplementary Fig. 4. RexT resembles the ArsR-SmtB protein NoIR.** An overlay of RexT with NoIR<sup>8</sup> (PDB: 4ON0) based on their Ca atoms. RexT is shown in light gray and NoIR is shown in blue. Dashed and dotted lines show the distance between mid-points of the recognition helix and between the tip of the “wing” (dark gray label for RexT and blue label for NoIR).

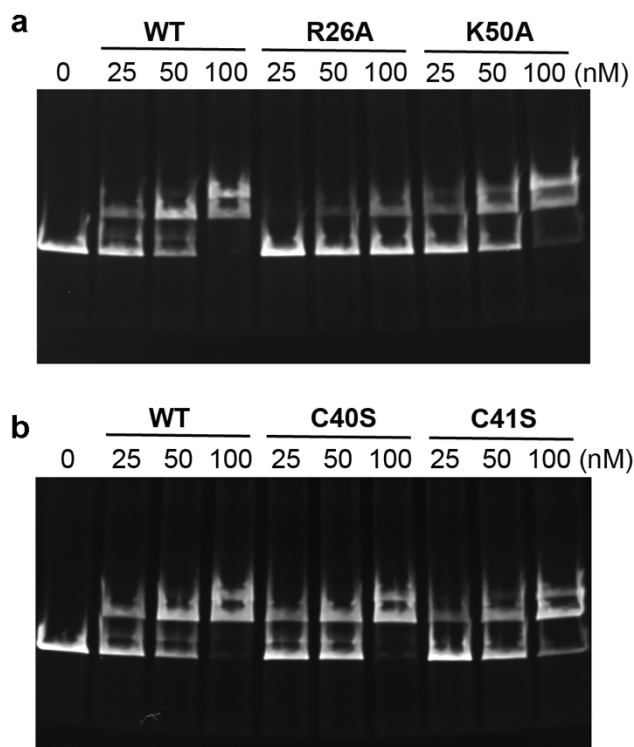

**Supplementary Fig. 5. An electrophoretic mobility shift assay for RexT and its variants allows for probing interaction with DNA.** (a) The DNA probe (20 nM) was incubated with 25, 50 and 100 nM of wild type (WT) dimeric RexT and the R26A, K50A variants at room temperature for 30 min. Both variants impact the ability of RexT to interact with DNA. (b) The DNA probe (20 nM) was also incubated with 25, 50 and 100 nM WT dimeric RexT and the C40S and C41S variants at room temperature for 30 min. The C40S variant doesn't show much difference in DNA-binding relative to WT RexT whereas C41S showed decreased DNA-binding affinity. In both panels, the 0 nM lane is the negative control where no protein was added.

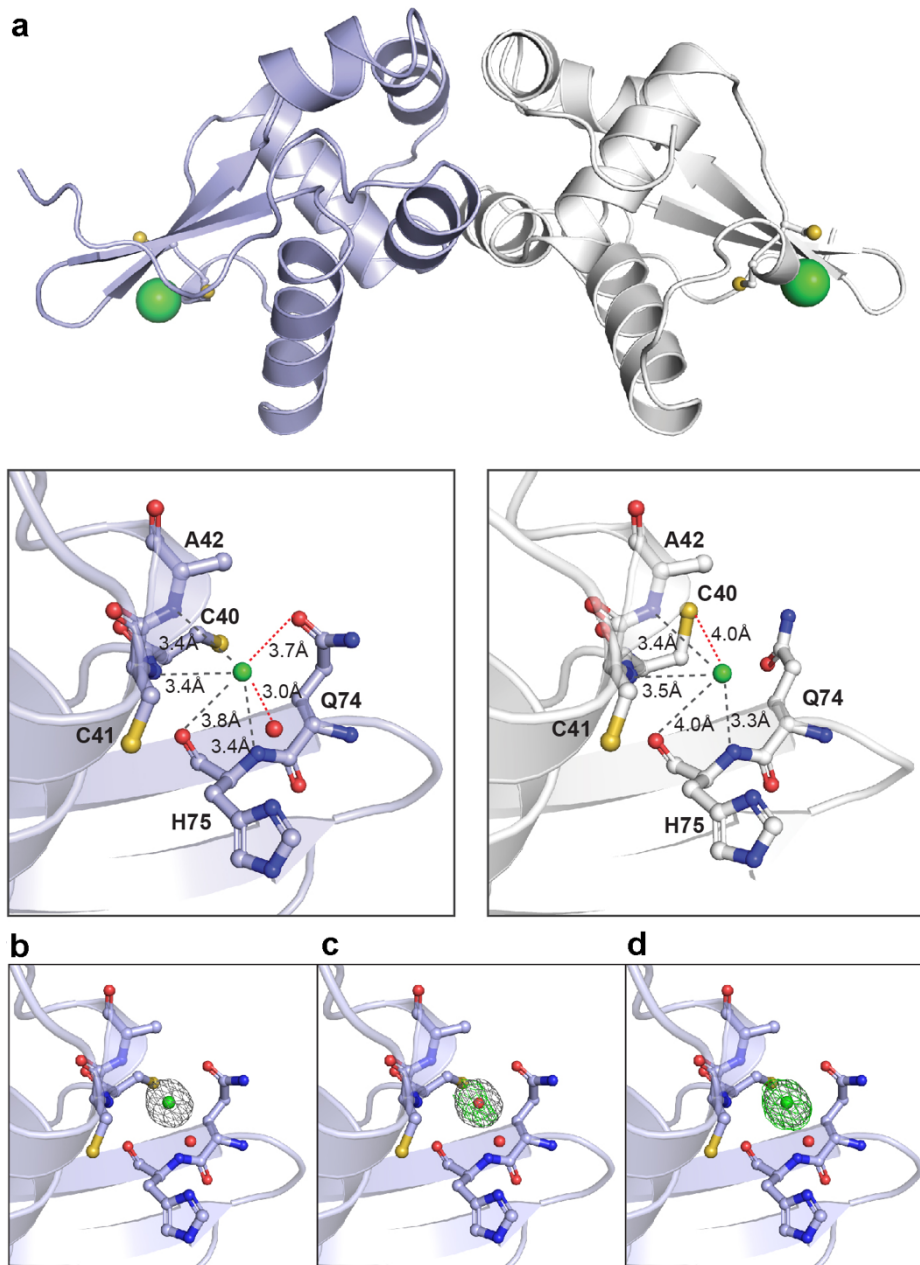

**Supplementary Fig. 6. Two modeled chloride ions serve as a mimic of the DNA backbone in the crystal structure of RexT.** (a) Two chloride ions are found in the crystal structure of reduced RexT, between Cys40 and Cys41. The chloride ions interact with the protein backbones, side chains, and water molecules in chain A (blue, bottom left panel) and chain B (white, bottom right panel). Dashed gray lines show conserved interactions in both chains A and B, including the interaction with the Cys41 backbone amide nitrogen, Ala42 backbone amide nitrogen and His75 backbone carbonyl oxygen and amide nitrogen. Red dotted lines show subunit-specific interactions. In chain A, the chloride interacts with a nearby water and the side chain oxygen of Asn74. In chain B, the chloride may have a weak interaction with the sulfur atom of Cys40. (b) The 2Fo-Fc (gray) and Fo-Fc (green/red) electron density map calculated for the refined structure of RexT around the modeled chloride ion. These maps are shown contoured at  $1.0\sigma$  and  $\pm 3.0\sigma$ , respectively. (c) The 2Fo-Fc (gray) and Fo-Fc (green/red) electron density map calculated after chloride was omitted from the structure of RexT and water was modeled in its place. These maps are shown contoured at  $1.0\sigma$  and  $\pm 3.0\sigma$ , respectively. (d) The 2Fo-Fc (gray) and Fo-Fc (green/red) electron density map calculated after the chloride ion was omitted from the structure of RexT. These maps are shown contoured at  $1.0\sigma$  and  $\pm 3.0\sigma$ , respectively.

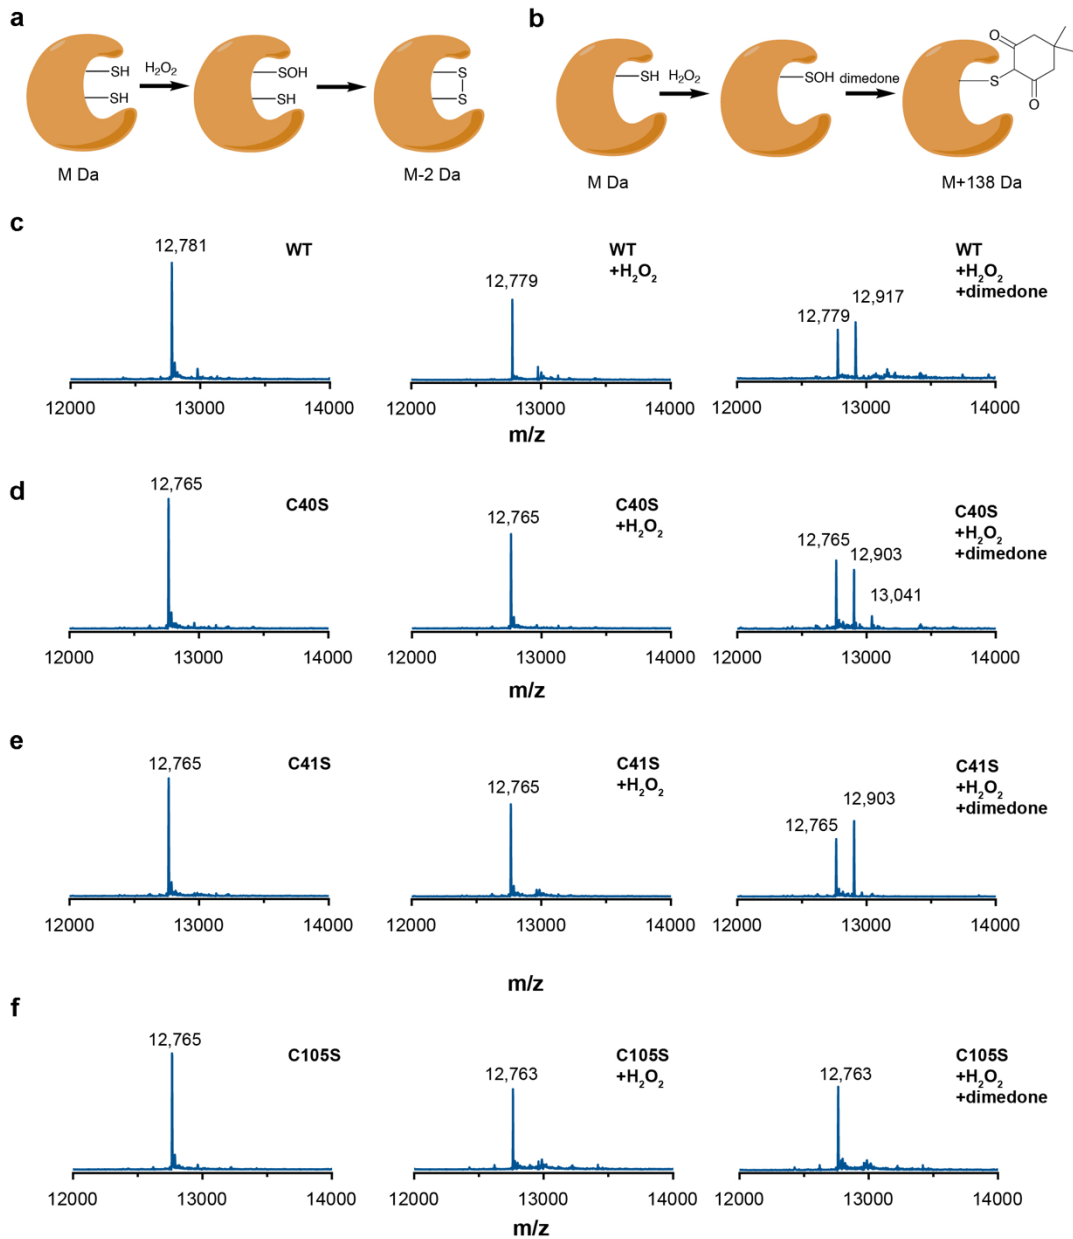

**Supplementary Fig. 7. Mass spectrometry reveals key insights into disulfide bond formation.** (a) To probe the identity of the disulfide bond forming Cys residues, mass spectrometry experiments were performed on wild-type (WT) RexT and each of its Cys variants in the presence of  $\text{H}_2\text{O}_2$ . The mass of RexT with a disulfide bond should be 2 Da less than when a disulfide bond is not formed. (b) As disulfide bond formation proceeds through formation of a sulfenic acid moiety, mass spectrometry was also used to look for incorporation of the small molecule dimeredone into RexT following the addition of  $\text{H}_2\text{O}_2$ . This experiment was performed to identify the peroxidatic Cys residue. Incorporation of one molecule of dimeredone into RexT results in a 138 Da increase in the mass of the protein. (c) The mass spectrometry experiments are shown for WT RexT in the absence of  $\text{H}_2\text{O}_2$  (left), presence of  $\text{H}_2\text{O}_2$  (middle), and presence of  $\text{H}_2\text{O}_2$  and dimeredone (right). These experiments show formation of a disulfide bond (middle), formation of a disulfide bond and the incorporation of one molecule of dimeredone (right). (d) Mass spectrometry of the C40S RexT variant shows no formation of a disulfide bond (middle) and the incorporation of two molecules of dimeredone (right). (e) Mass spectrometry of the C41S RexT variant shows no formation of a disulfide bond (middle) and the incorporation of one molecule of dimeredone (right). (f) Mass spectrometry of the C105S RexT variant shows formation of a disulfide bond (middle), formation of a disulfide bond and no incorporation of dimeredone (right).

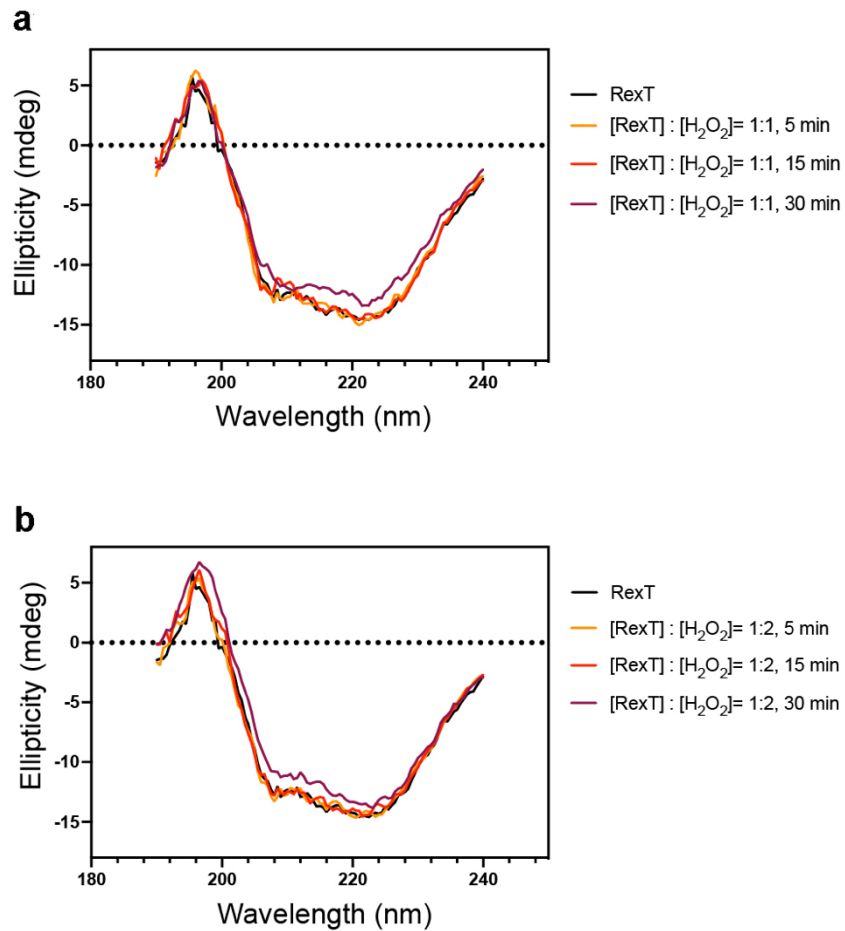

**Supplementary Fig. 8. Circular dichroism experiments reveal that RexT has a similar architecture in the presence and absence of H<sub>2</sub>O<sub>2</sub>.** (a) Circular dichroism (CD) data shows that the RexT (black) when combined with one equivalent of H<sub>2</sub>O<sub>2</sub> does not remarkably change in structure over time (orange, red, and purple). (b) Similarly, CD data shows that the RexT (black) when combined with two equivalents of H<sub>2</sub>O<sub>2</sub> does not remarkably change in structure over time (orange, red, and purple).



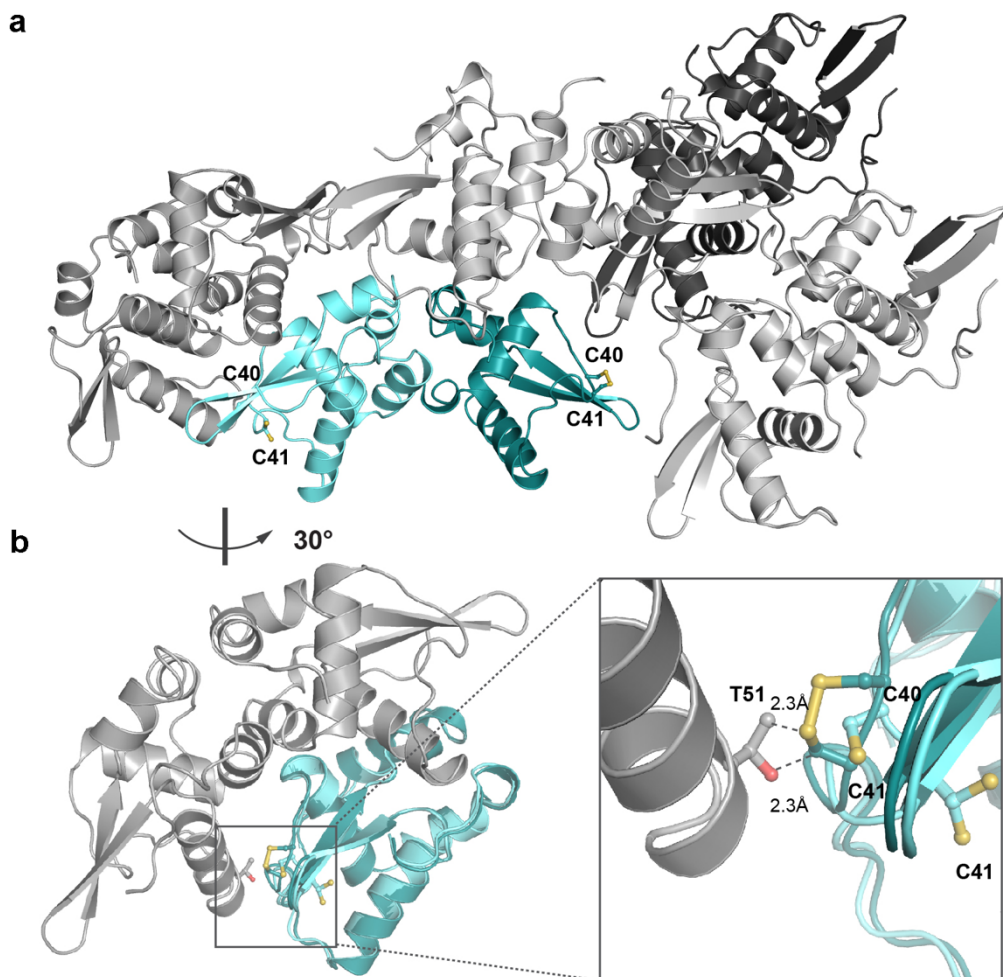

**Supplementary Fig. 9. Crystal packing likely prevents disulfide bond formation in chain A.** (a) The oxidized structure of RexT (chain A is cyan and chain B is dark cyan) with its crystal symmetry mates (gray). In chain B, there is space for a disulfide bond to be formed between Cys40 and Cys41. In chain A, a symmetry molecule is packed up against where the bond would be formed. (b) Chain B of RexT is overlaid with chain A to show the clash that would occur upon disulfide bond formation.

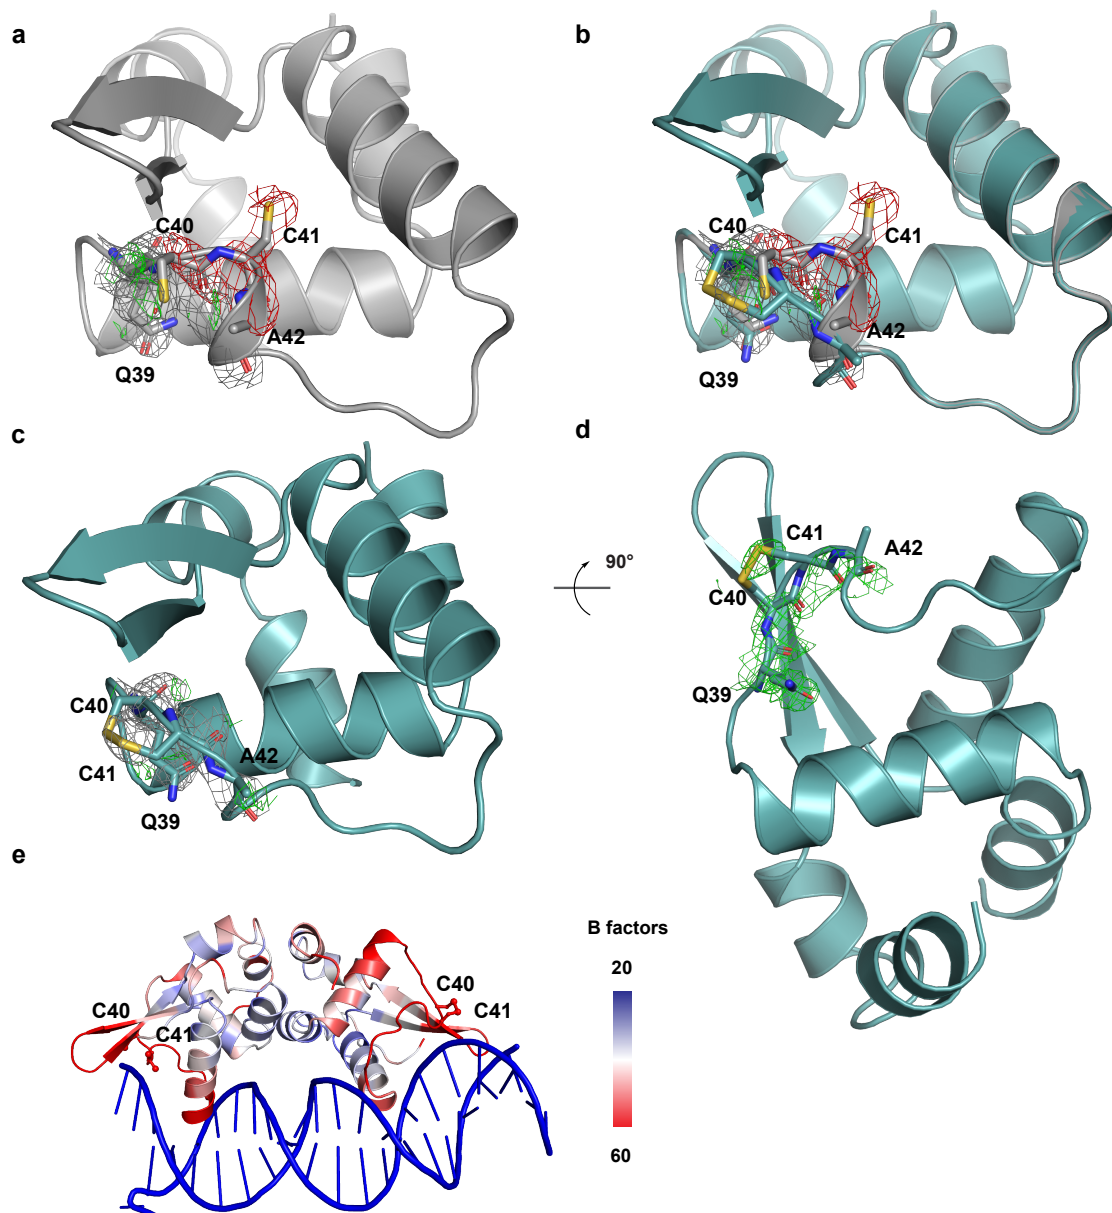

**Supplementary Fig. 10. A significant conformational change occurs in the RexT structure following oxidation.** (a) The reduced structure of RexT (gray) has a different conformation than the oxidized in the  $\alpha 3$  helical region. Shown in this panel are the 2Fo-Fc (gray) and Fo-Fc (green/red) electron density maps contoured at  $1.0\sigma$  and  $\pm 2.0\sigma$ , respectively, when the structure of the reduced RexT is used as a model for the oxidized RexT data. (b) Modeling the oxidized structure (cyan) with a disulfide bond is a better fit of the data. Again, the 2Fo-Fc (gray) and Fo-Fc (green/red) electron density maps contoured at  $1.0\sigma$  and  $\pm 2.0\sigma$ , respectively. (c) The refined 2Fo-Fc (gray) and Fo-Fc (green/red) electron density maps contoured at  $1.0\sigma$  and  $\pm 2.0\sigma$ , respectively, around the oxidized structure in the region of the modeled disulfide bond are shown. (d) A Fo-Fc omit (green) electron density map contoured at  $\pm 2.0\sigma$  is shown around the  $\alpha 3$  helical region after it was omitted from the refined structure of oxidized RexT. (e) Alignment of the oxidized RexT structure with the DNA-bound NoIR structure (PDB: 4ON0)<sup>8</sup> shows that the wHTH regions of RexT that interact with DNA are highly flexible.

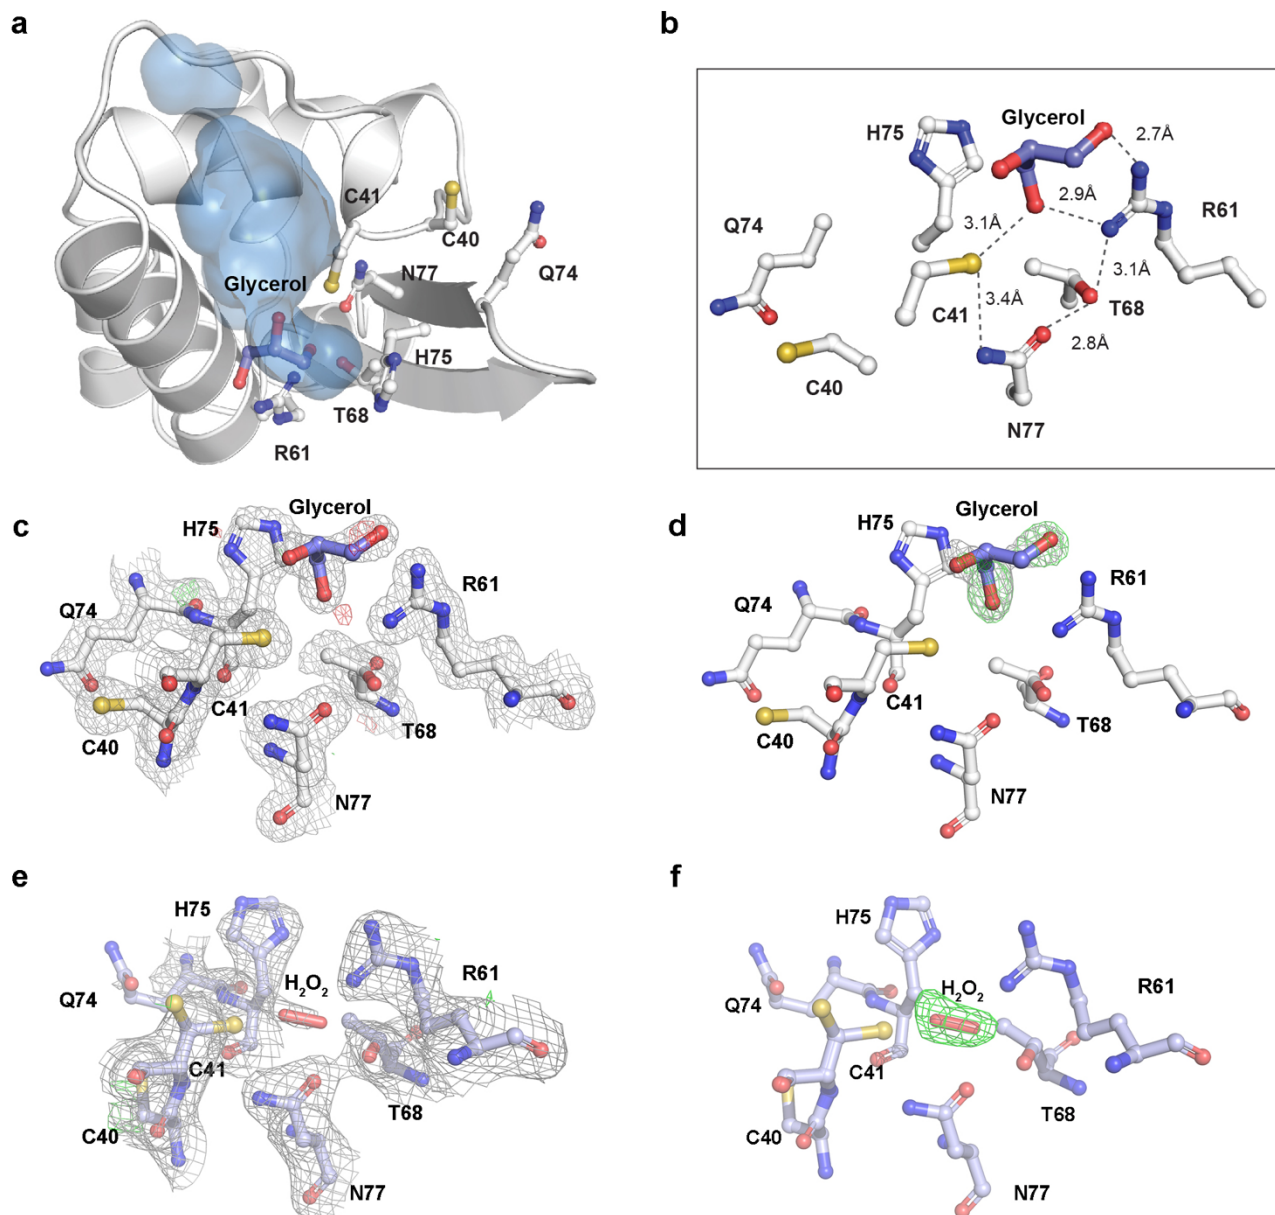

**Supplementary Fig. 11. The structure of RexT reveals key structural features for responding to H<sub>2</sub>O<sub>2</sub>.** (a) A surface cavity (blue) is identified that leads from the surface of RexT to the Cys 41 residue. The calculated cavity of chain B in the reduced RexT structure contains a glycerol molecule from the cryoprotectant. (b) The bottom of the calculated cavity that surrounds Cys41 contains residues arranged in a way that suggests they are important players in activation of H<sub>2</sub>O<sub>2</sub>. (c) The electron density maps for the residues and glycerol molecule shown in panel B are displayed. The refined 2Fo-Fc (gray) and Fo-Fc (green/red) electron density maps contoured at 0.9 $\sigma$  and  $\pm$ 3.0 $\sigma$ , respectively. (d) The 2Fo-Fc and Fo-Fc electron density map calculated after glycerol was omitted from the structure of reduced RexT. These maps are shown contoured at 0.9 $\sigma$  and  $\pm$ 3.0 $\sigma$ , respectively. (e) The 2Fo-Fc (gray) and Fo-Fc (green/red) electron density maps for the residues and H<sub>2</sub>O<sub>2</sub> molecule from Fig. 5B are displayed contoured at 0.9 $\sigma$  and  $\pm$ 3.0 $\sigma$ , respectively. (f) The 2Fo-Fc and Fo-Fc electron density map calculated after H<sub>2</sub>O<sub>2</sub> was omitted from chain A of the oxidized RexT structure are displayed contoured at 0.9 $\sigma$  and  $\pm$ 3.0 $\sigma$ , respectively.

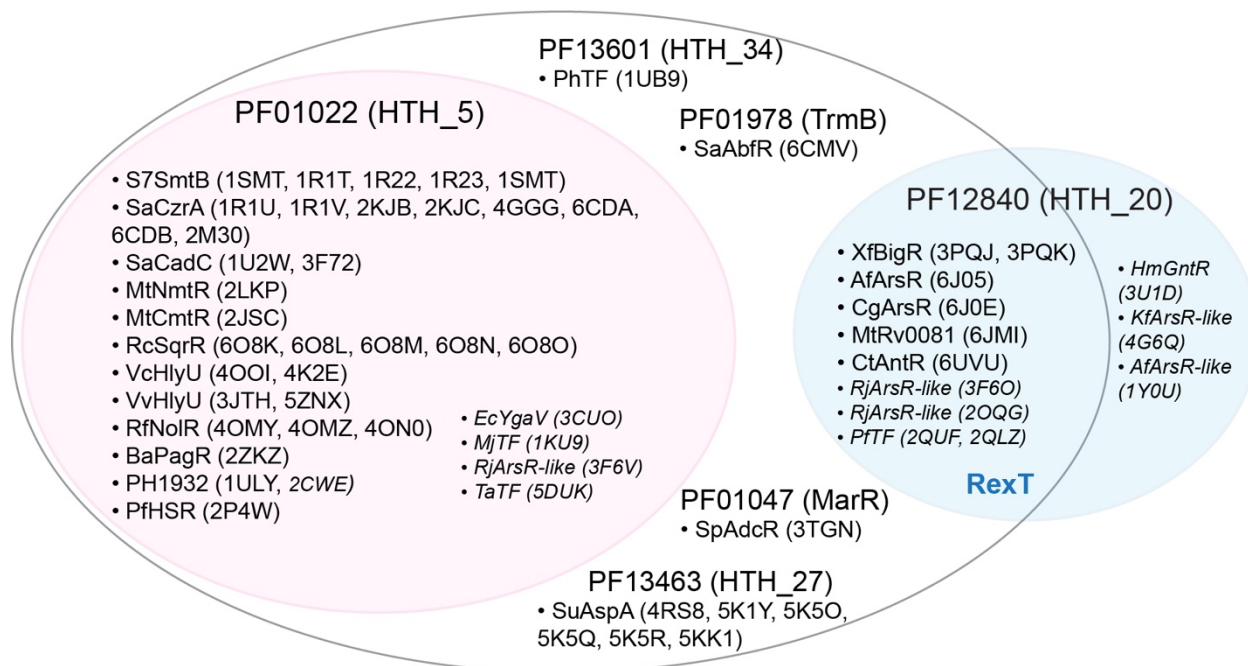

**Supplementary Fig. 12. The HTH ArsR-SmtB-type DNA-binding domain and related protein families were used to generate a sequence similarity network (SSN).** Proteins and their structures that have an annotated “HTH ArsR-type DNA-binding domain” (IPR001845, large oval shape). This classification encompasses a few protein families, predominantly PF01022 (HTH\_5, shaded in pink) and PF12840 (HTH\_20, shaded in blue). Notably a few proteins that belong to PF12840 do not have the annotated IPR001845 domain (shaded in blue, outside of the large oval). Proteins and PDB IDs shown in italics do not have an accompanying publication.

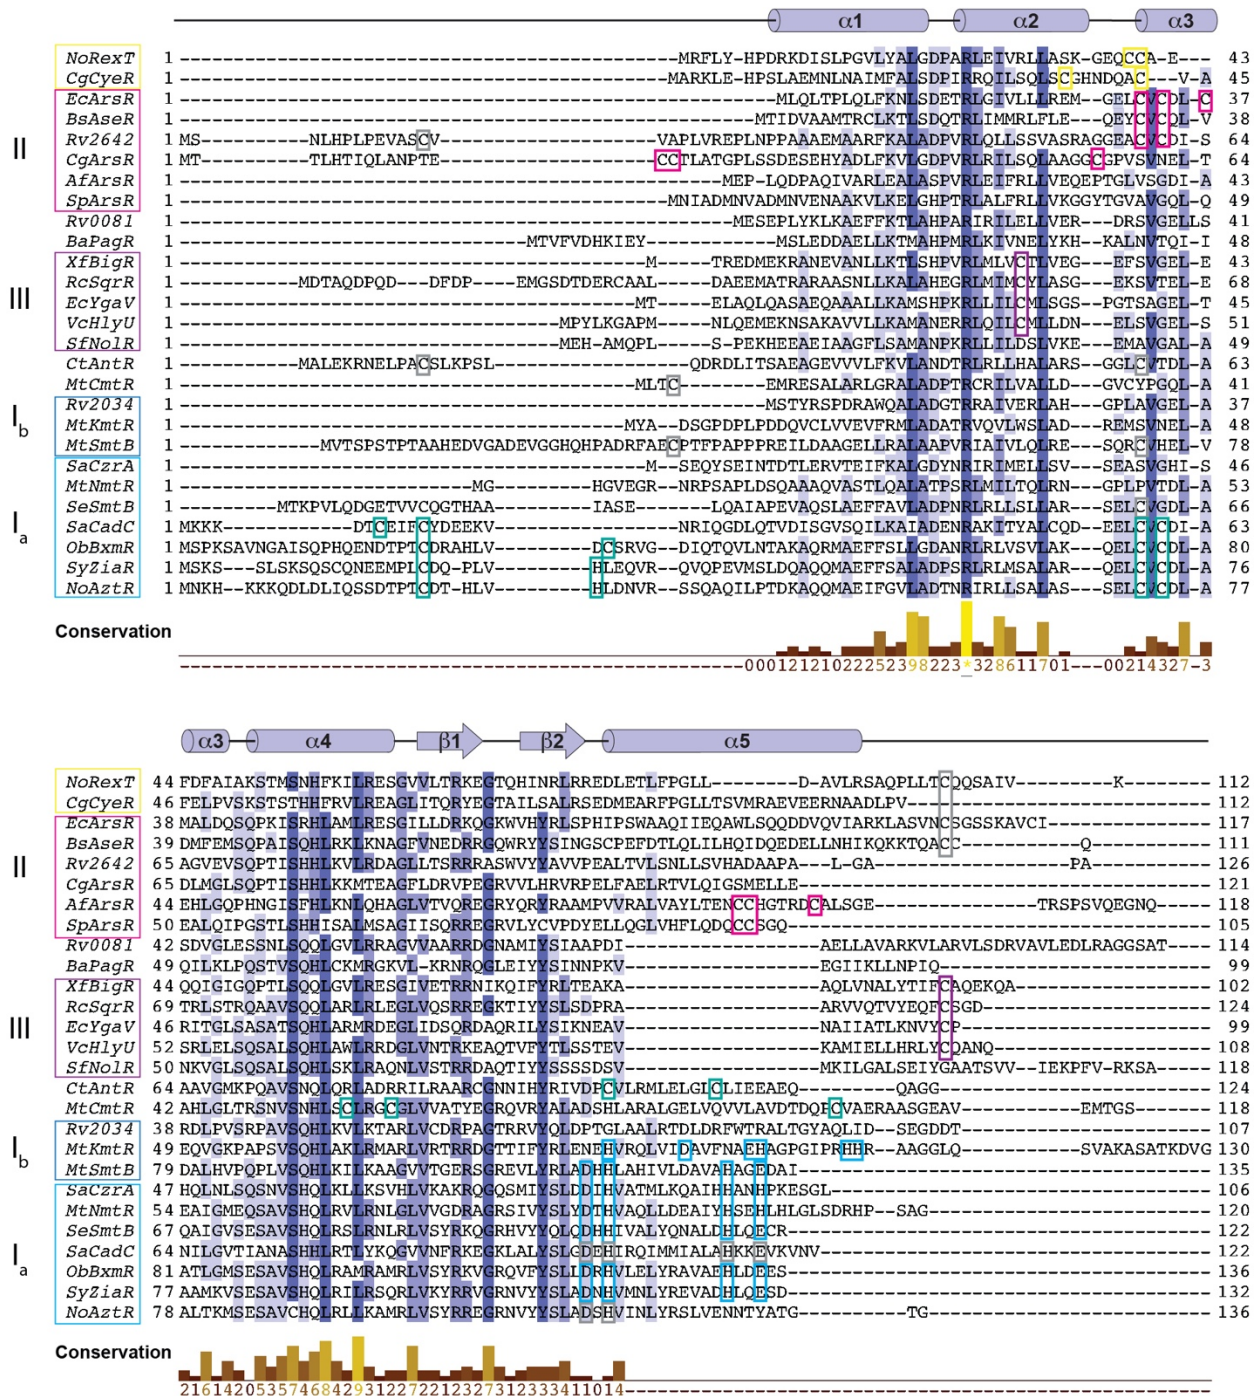

**Supplementary Fig. 13. Sequence alignment of previously characterized members of the ArsR-SmtB family.** Conserved secondary structures are labeled as cylinders ( $\alpha$ -helices) and arrows ( $\beta$ -strands) based on the consensus. Key amino acid residues that are implicated in regulatory process are colored: blue, His/Asp/Glu-rich motif for binding of “hard” metal ions such as  $\text{Ni}^{2+}$  and  $\text{Zn}^{2+}$ ; green, Cys-rich motif for binding “soft” metal ions such as  $\text{Pb}^{2+}$  and  $\text{Cd}^{2+}$ ; magenta, Cys-rich motif for binding of arsenite or methyl-arsenite; purple, key Cys residues that are involved in redox processes to bind RSS or an unknown species; yellow, key Cys residues that are involved in the ROS response; gray, residues that resembles above-mentioned conserved motifs but do not exhibit any function and are likely the remnant of evolution. The residues responsible for regulation in NolR, Rv0081, Rv2034 and BaPagR are unknown.

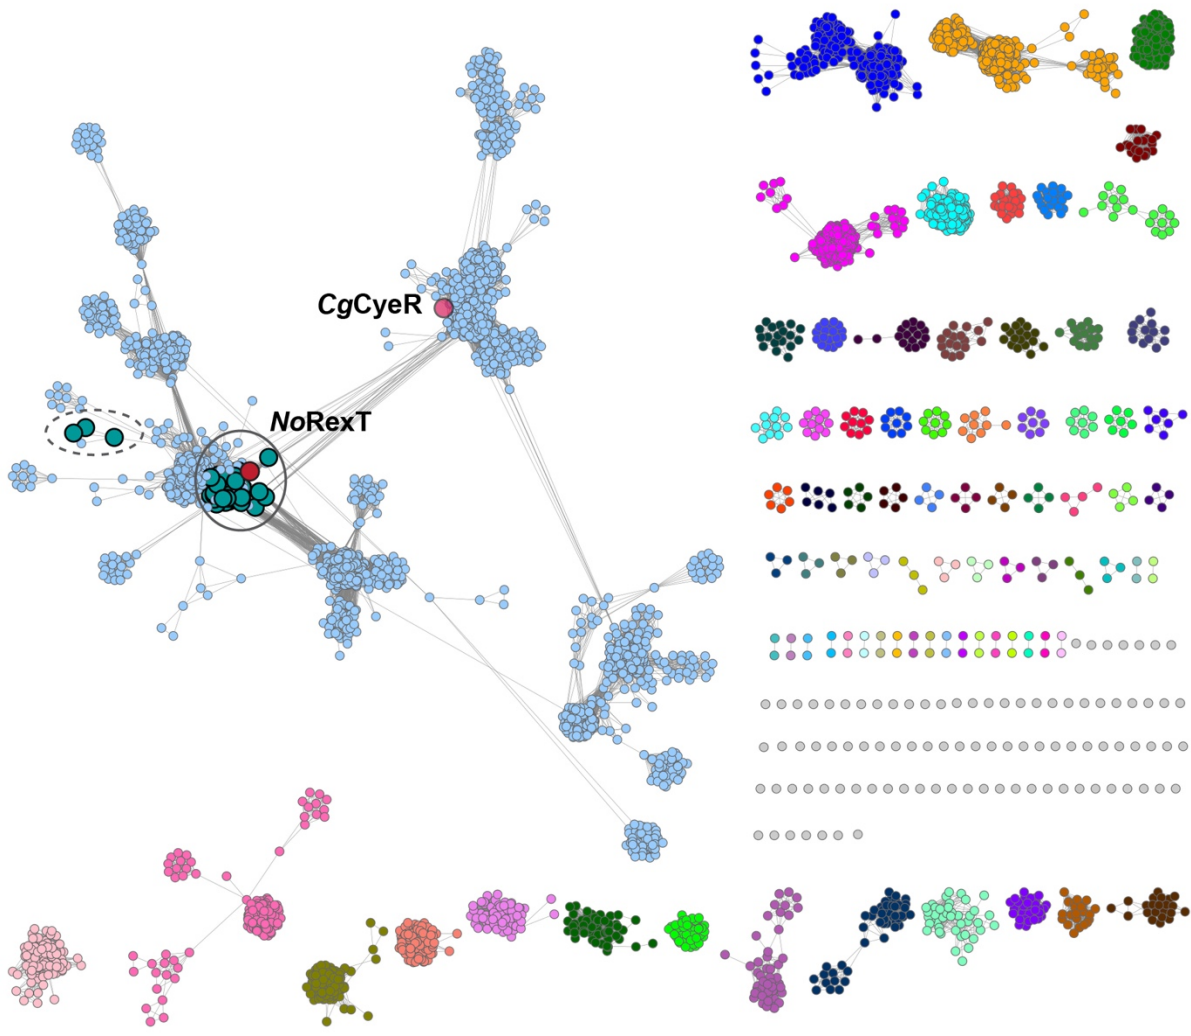

**Supplementary Fig. 14. The sub-sequence similarity network with genomic neighborhood information annotated for the RexT cluster.** The network is a subset of the network shown in Fig. 6 (the RexT cluster) and consists of 7074 sequences of RexT homologs (the 7085 sequences from Fig. 6 were submitted to the server). It is analyzed in Cytoscape at the cut-off value of  $e^{-32}$ . The network is further annotated by the EFI-genome neighborhood tool<sup>9,10</sup> by checking the ten or three genes upstream and downstream of the RexT homologs. The nodes are color-coded based on the numbering of the multi-node clusters in order of decreasing number of sequences. The Pfam for thioredoxin (PF00085) was used as a query to identify its co-occurrence with the RexT homologs. Of interest to this work, in 121 and 108 instances, a thioredoxin gene was found to be within the ten or three-gene neighborhood of RexT homologs, respectively. However, in only 105 of the identified instances is a thioredoxin gene adjacent to a RexT homolog (large teal nodes). 102 of the 105 RexT homologs are from Cyanobacteria (circled with a solid line), two are from unclassified bacteria and one is from Abditibacteria (circled with a dashed line). RexT from *Nostoc* sp. PCC 7120 (*NoRexT*) is highlighted in dark red. *CgCyeR* is found in a different cluster in this network.

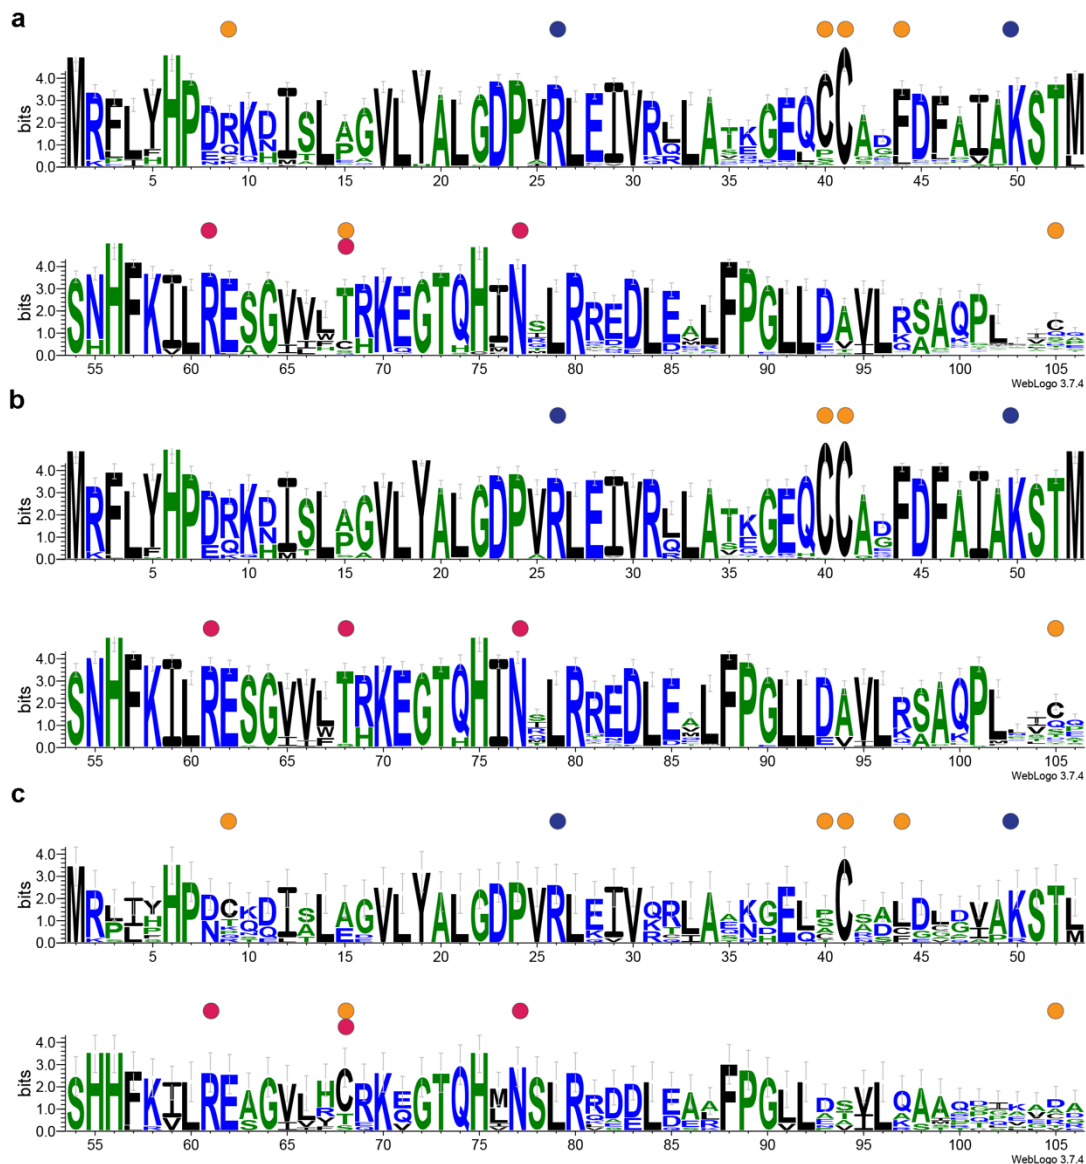

**Supplementary Fig. 15. Sequence alignment of RexT homologs reveals complete conservation of Cys41.** Sequences were aligned by Clustal W and visualized by WebLogo 3<sup>11</sup> for the first 106 amino acid positions. Orange dots indicate positions where a Cys residue occurs, even at positions of lower occurrence. Dark blue and magenta dots highlight conserved DNA-binding and H<sub>2</sub>O<sub>2</sub> activating residues discussed in the main text. (a) The alignment of 104 RexT homologs that were identified adjacent to a thioredoxin gene reveals that the Cys41 residue is completely conserved. In addition, Arg26, and Lys50, which were shown in this work to be involved in DNA binding are completely conserved. The RexT homolog from *Acaryochloris marina* 11017 (UniProt ID: B0C3H5) has an N-terminal truncation of about 25 amino acids and was omitted in the WebLogo visualization. (b) The alignment of 84 RexT homologs from *Nostocales* reveals the conservation of Cys40 and Cys41. Only one homolog from *Tolypothrix* sp. NIES-4075 (UniProt ID: A0A218QHS2) does not contain Cys40. (c) The sequence alignment of 11 homologs from the *Synechococcales* and *Oscillatoriales* shows the conservation of Cys41, with occurrence of Cys residues also being found at positions 9, 40, 44, 68, 105.

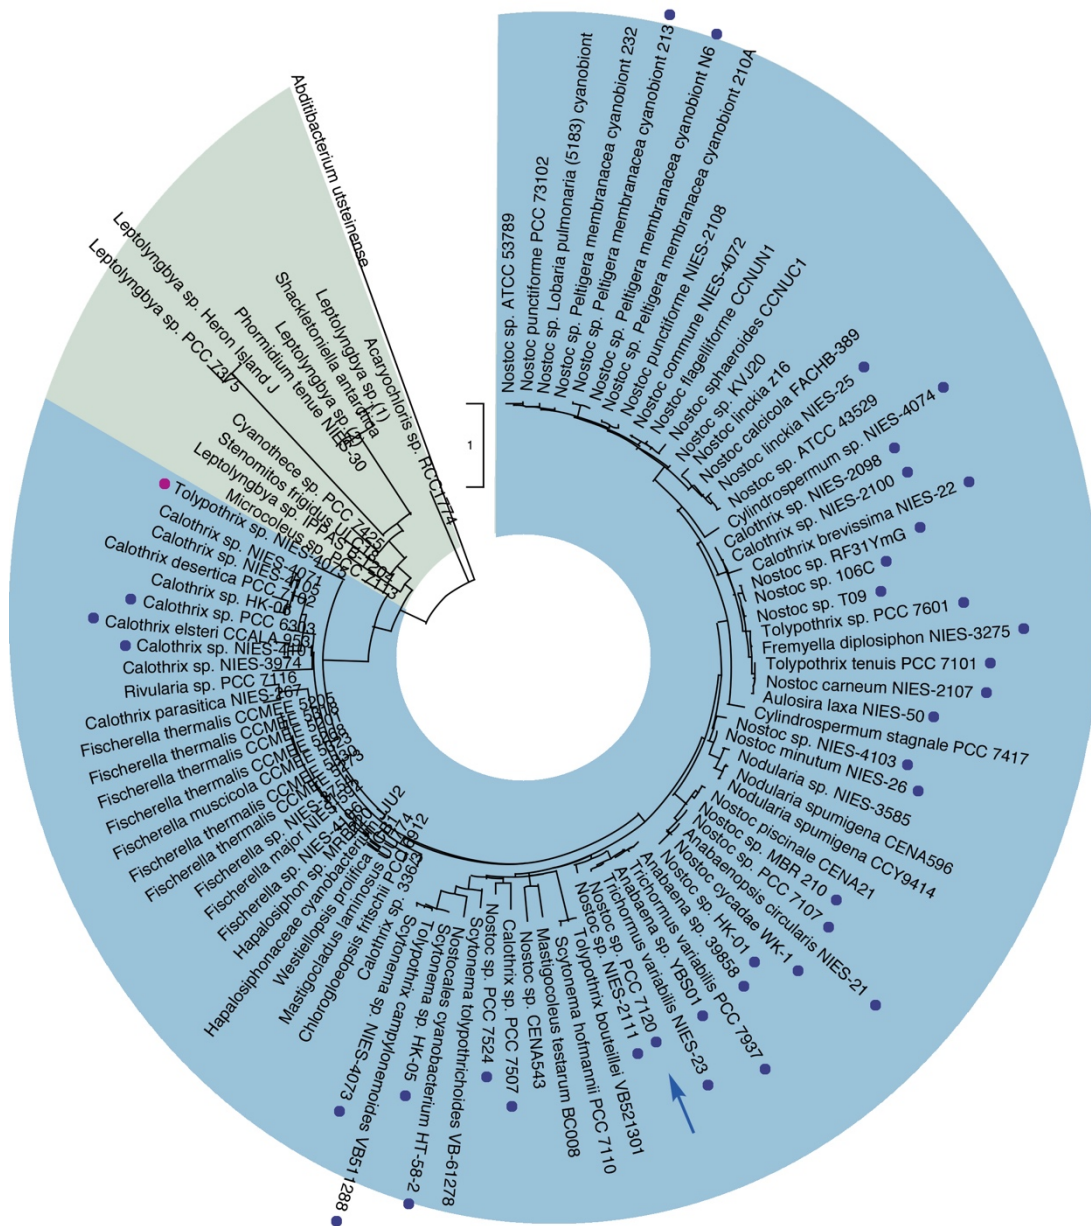

**Supplementary Fig. 16. A rooted phylogenetic tree for RexT homologs from three orders of Cyanobacteria.** This analysis was conducted in MEGA X<sup>12,13</sup> and involved 96 RexT homologs. The RexT sequence from *Abditibacterium utsteinense* (UniProt ID: A0A2S8SU85) was used as the outgroup. The evolutionary history was inferred by using the Maximum Likelihood method and JTT matrix-based model<sup>14</sup>. The tree with the highest log likelihood (-4801.45) is shown. Initial tree(s) for the heuristic search were obtained automatically by applying Neighbor-Join and BioNJ algorithms to a matrix of pairwise distances estimated using the JTT model, and then selecting the topology with superior log likelihood value. A discrete Gamma distribution was used to model evolutionary rate differences among sites (5 categories (+G, parameter = 0.3614)). The tree is drawn to scale, with branch lengths measured in the number of substitutions per site. The 11 RexT homologs from *Synechococcales* and *Oscillatoriales* are colored in green and the 84 RexT homologs from *Nostocales* are colored in blue. The RexT homolog from *Tolypothrix* sp. NIES-4075 that does not contain Cys40 is highlighted by a pink dot, and RexT homologs from *Nostocales* that contain an additional Cys105 are highlighted by a blue dot. RexT from *Nostoc* sp. PCC 7120 studied in this work is indicated by an arrow.



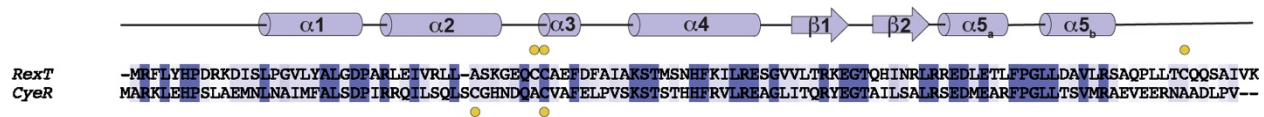

**Supplementary Fig. 17. Alignment of RexT with CyeR shows conservation of Cys41.** Yellow dots highlight the position of Cys. The secondary structure illustration is based on RexT structure.

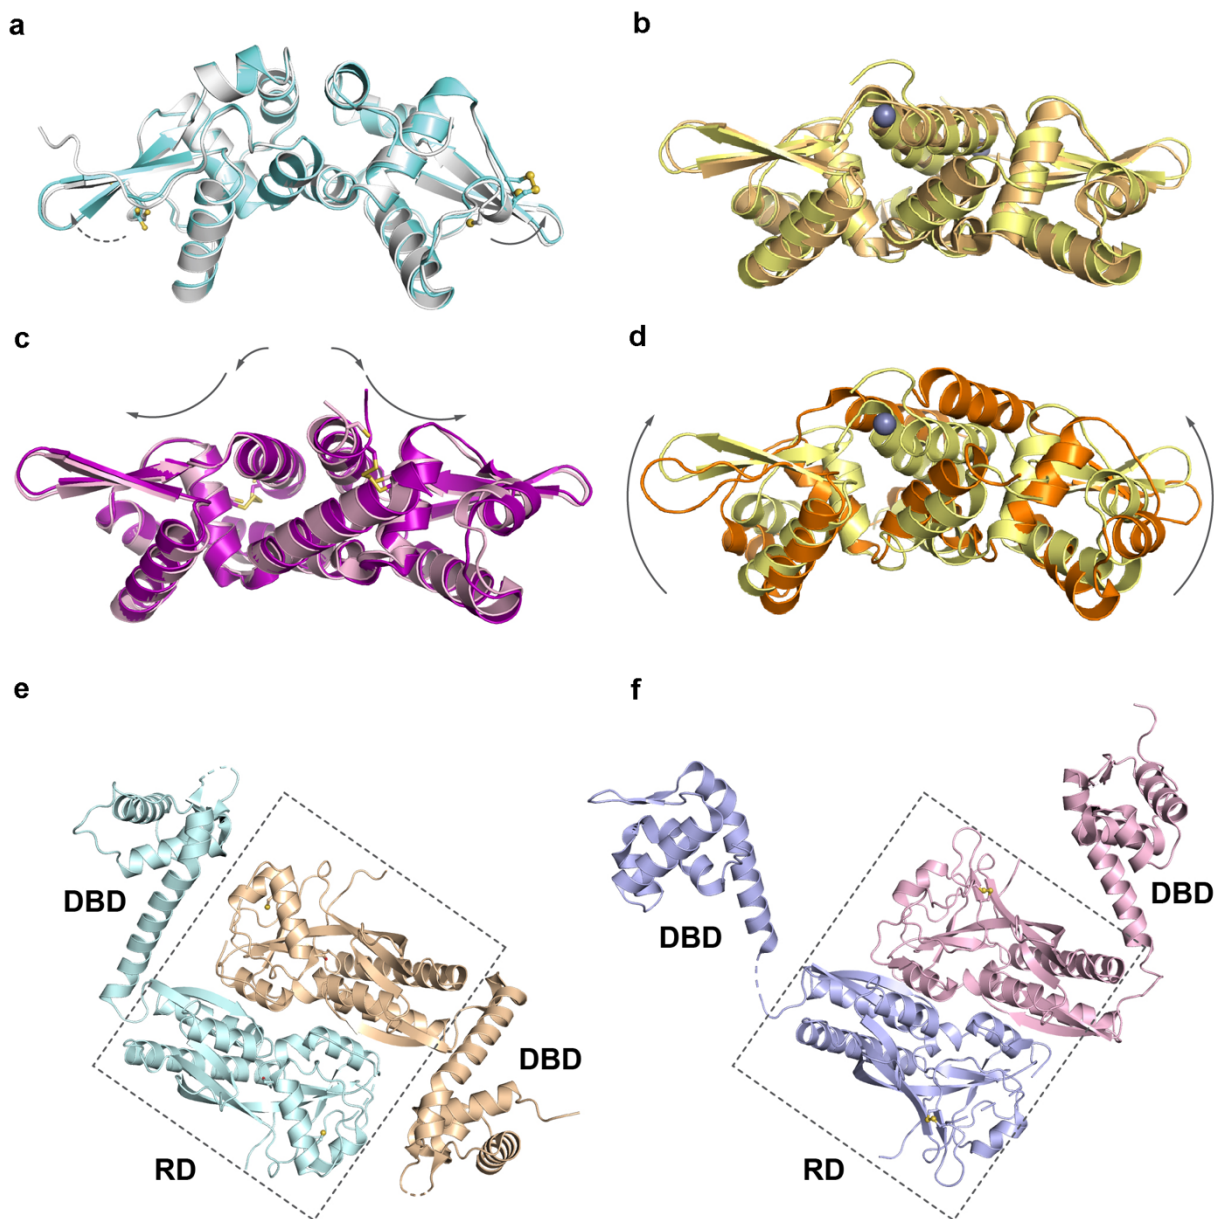

**Supplementary Fig. 18. Comparison of RexT with other ArsR-SmtB members in different states suggests possible mechanism of regulation.** (a) RexT is shown in its reduced (white) and oxidized states (cyan). Superposition of these two structures resulted an rmsd of 0.38 Å over 1258 atoms. The solid arrow highlights the local conformational change from the reduced state to the oxidized state in chain B that is observed in the crystal structures. The dashed arrow suggests a similar motion is possible in chain A if crystalline restraints were not in place. (b) SaCzrA in its apo form<sup>6</sup> (wheat, PDB ID: 1R1U) and its Zn<sup>2+</sup>-bound form<sup>15</sup> (yellow, PDB ID: 2M30, NMR structure). Superposition of two structures resulted an rmsd of 1.44 Å over 1287 atoms. (c) RcSqrR<sup>16</sup> in its apo form (light pink, PDB ID: 6O8K) and tetrasulfide-bound form (dark pink, PDB ID: 6O8N). Superposition of the two structures resulted in an rmsd of 0.74 Å over 1185 atoms. Solid arrows suggest possible motions of the protein upon tetrasulfide formation. (d) SaCzrA in its Zn<sup>2+</sup>-bound form<sup>15</sup> (yellow) and DNA-bound form<sup>17</sup> (orange, PDB ID: 2KJB, NMR solution structure). Superposition of two structures resulted an rmsd of 4.39 Å over 2972 atoms. Arrows suggest the possible motion of SaCzrA switching from the DNA-bound state to the Zn<sup>2+</sup>-bound state. (e-f) The DNA binding domain (DBD) of CgOxyR<sup>18</sup> shows a significant conformational change when OxyR transitions from the reduced state (PDB: 6G1D) to its oxidized state (PDB: 6G1B). The regulatory domains (RD) show little global movement. CgOxyR is a tetramer, but a dimeric representation is shown here to better visualize the change in the DBD.

**Supplementary Table 1. The sequence of DNA duplex probe used for EMSA and fluorescence anisotropy (FA)**

|                         |                                                                                                                                                                                                                                                                                                                                                                                                             |
|-------------------------|-------------------------------------------------------------------------------------------------------------------------------------------------------------------------------------------------------------------------------------------------------------------------------------------------------------------------------------------------------------------------------------------------------------|
| DNA probe sequence EMSA | GCTTGCTAACAATCGCACAATCTCCAATCGCGCTGGATCACCTAAGG<br>CATACAGCACTCCTGGTAAAGAAATATCTTTTCGGTCTGGATGATACA<br>GAAATCTCATAGTTGCATTATCTCTGAAAATAAATTATATTTTTATT <u><b>ATT</b></u><br><u><b>CG</b></u> GATAATATCGAATAAA <u><b>CGAAT</b></u> TAAGGGGGCAAGTAATATGTCATCCAT<br>TACAAATGTTACAGAAGCCACATTCAAGCAAGAAGTTCTGGATAGCAA<br>CGTTCCAGTTCTAGTGGACTTTTGGGCCCTTGGTGTGGCCCTTGTC<br>GGATGGTAGCGCCGTTGTGGATGAAGTTGCTAGCGA |
| DNA probe sequence FA   | TTATT <u><b>ATTCG</b></u> AATAATATCGAATAAA <u><b>CGAAT</b></u> TAAGG                                                                                                                                                                                                                                                                                                                                        |

Note: The sequence is shown from 5' to 3' only. The palindromic DNA-binding sites<sup>19</sup> are in bold and underlined.

**Supplementary Table 2. Binding constants of RexT and its variants to DNA duplex fluorescence probe**

| Protein                       | $K_d$ ( $\mu$ M) | $A_{max}$ (Initial) | $A_{max}$ (Fitted) |
|-------------------------------|------------------|---------------------|--------------------|
| WT                            | 1.08±0.07        | 1.000               | 1.048±0.017        |
| C40S                          | 0.95±0.05        | 1.001               | 1.019±0.013        |
| C41S                          | 1.35±0.11        | 1.004               | 1.019±0.021        |
| R26A                          | 5.18±1.22        | 0.967               | 0.980±0.065        |
| K50A                          | 5.29±1.86        | 0.938               | 0.900±0.088        |
| WT + 2.5 eq. Cd <sup>2+</sup> | 1.20±0.10        | 0.999               | 1.017±0.022        |

**Supplementary Table 3. Primers used for mutagenesis**

| Variants |   | Primer sequence                             |
|----------|---|---------------------------------------------|
| C40S     | F | 5'-GCAAAGGCGAGCAGAGCTGCGCGGAATTC-3'         |
|          | R | 5'-GAATTCGCGCAGCTCTGCTCGCCTTTGC-3'          |
| C41S     | F | 5'-GGCGAGCAGTGCAGCGCGGAATTCG-3'             |
|          | R | 5'-CGAATTCGCGGCTGCACTGCTCGCC-3'             |
| C105S    | F | 5'-CCGCTGCTGACCAGCCAACAGAGCG-3'             |
|          | R | 5'-CGCTCTGTTGGCTGGTCAGCAGCGG-3'             |
| R26A     | F | 5'-GGGCGACCCGGCGGCTCTGGAGATTGTT-3'          |
|          | R | 5'-AACAAATCTCCAGAGCCGCCGGGTCGCC-3'          |
| K50A     | F | 5'-TCGATTTTGCATCGCGGCGAGCACCATGAGCAACC-3'   |
|          | R | 5'-GGTTGCTCATGGTGCTCGCCGCGATCGCAAATCGA-3'   |
| R61A     | F | 5'-GCAACCACTTCAAATTCTGGCTGAGAGCGGTGTGGT-3'  |
|          | R | 5'-ACCACACCGCTCTCAGCCAGAATTTTGAAGTGGTTGC-3' |
| T68A     | F | 5'-GCGGTGTGGTTCTGGCCCGTAAGGAAGGC-3'         |
|          | R | 5'-GCCTTCCTTACGGCCAGAACACACCGC-3'           |
| Q74A     | F | 5'-CCGTAAGGAAGGCACCGCACACATCAACCGTCTG-3'    |
|          | R | 5'-CAGACGGTTGATGTGTGCGGTGCCTTCCTTACGG-3'    |
| H75A     | F | 5'-GTAAGGAAGGCACCCAAGCCATCAACCGTCTGCGTC-3'  |
|          | R | 5'-GACGCAGACGGTTGATGGCTTGGGTGCCTTCCTTAC-3'  |
| N77A     | F | 5'-GGCACCCAACACATCGCCCGTCTGCGTCGTGA-3'      |
|          | R | 5'-TCACGACGCAGACGGCGGATGTGTTGGGTGCC-3'      |

**Supplementary Table 4. Key ArsR-SmtB members highlighted in the sequence similarity network**

| Name                 | UniProt ID | PDB ID                                         | Amino acid sequence                                                                                                                             | Sensory site |
|----------------------|------------|------------------------------------------------|-------------------------------------------------------------------------------------------------------------------------------------------------|--------------|
| <b>Metal-binding</b> |            |                                                |                                                                                                                                                 |              |
| SeSmtB               | P30340     | 1SMT, 1R22, 1R1T, 1R23                         | MTKPVLQDGETVVCQGTHAAIASELQAIPEVAQSLAEFFAVLADPNR<br>LRLLSLLARSELVGDLAQAIGVSESAVSHQLRSLRNLRLVSYRKQGR<br>HVYYQLQDHHIVALYQNALDHLQECR                | α5C          |
| MtSmtB               | P9WMI5     | /                                              | MVTSPSTPTAAHEDVGADEVGGHQHPADRFAECPTFPAPPPREILDA<br>AGELLRALAAPVRIAIVLQLRESQRCVHELVDALHVPQPLVSQHLKILK<br>AAGVVTGERSGREVLYRLADHHLAHIVLDAVAHAGEDAI | α5C          |
| SaCzrA               | O85142     | 1R1U, 1R1V, 2KJB, 2KJC, 2M30, 4GGG, 6CDA, 6CDB | MSEQYSEINTDTLERVTEIFKALGDYNRIRIMELLSVSEASVGHISHQLN<br>LSQSNVSHQLKLLKSVHLVKAKRQGGQSMIYSLDDIHVATMLKQAIHHAN<br>HPKESGL                             | α5C          |
| BsCzrA               | O31844     | /                                              | MTEFRETEQSAADLDEETFLVAQTFKALSDPTRIRILHLLSQGEHAVN<br>GIAEKLNLQSTVSHQLRFLKNLRLVKSRRREGTSIYYSPEDHVLVQLQ<br>QMIHHTQHD                               | α5C          |
| ObBxmR               | Q76L30     | /                                              | MSPKSAVNGAISQPHQENDTPTCDRAHLVDCSRVGDQIQTLNTAKA<br>QRMAEFFSLLGDANRLRLVSVLAKQELCVCDLAATLGMSESAVSHQL<br>RAMRAMRLVSYRKVGRQVFYSLDRHVLELYRAVAEHLDEES  | α3N+α5C      |
| SyZiaR               | Q55940     | /                                              | MSKSSLKSKSQSCQNEEMPLCDQPLVHLEQVRQVQPEVMSLDQAQQM<br>AEFFSALADPSRLRLMSALARQELCVCDLAAAMKVSESAVSHQLRILRS<br>QRLVKYRRVGRNVYYSLADNHVMNLYREVADHLQESD   | α3N+α5C      |
| NoAztR               | Q8ZS91     | /                                              | MNKHKKKQDLDLIQSSDPTCDTHLVHLDNVRSSQAQILPTDKAQQMA<br>EIFGVLADTNRIRLLSALASSELCVCDLAALTKMSESAVCHQLRLLKAMR<br>LVSYRREGRNVYYSLADSHVINLYRSLVENNTYATGTG | α3N          |
| SaCadC               | P20047     | 1U2W, 3F72                                     | MKKKDTCEIFCYDEEKVNRIQGDQLQTVDISGVSQILKAIADENRAKITYAL<br>CQDEELCVCDIANILGVTIANASHHLRTRYKQGVNFRKEGKLALYSLGD<br>EHIRQIMMIALAHKKEVKVNV              | α3N          |
| MtNmtR               | O69711     | 2LKP                                           | MGHGVEGRNRPSAPLDSQAAAQVASTLQALATPSRLMILTQLRNGPLP<br>VTDLAEAIGMEQSAVSHQLRVLRLNLGLVVGDRAGRSIVYSLYDTHVAQ<br>LLDEAIYHSEHLHLGLSDRHPSAG               | α5C          |
| MtKmtR               | O53838     | /                                              | MYADSGPDPLPDDQVCLVVEVFRMLADATRVQVLWVSLADREMSVNEL<br>AEQVGKPAVSQHLAKLRMARLVRTRRDGTTIFYRLENEHVRQLVID<br>AVFNAEHAGPGIPRHHRAAGGLQSVAKASATKDVG       | α5C          |
| MtCmtR               | P9WMI9     | 2JSC                                           | MLTCEMRESALARLGRALADPTRCRILVALLDGVCYPGQLAAHLGLTR<br>SNVSNHLSCLRGCLVATYEGRQVRYALADSHLARALGELVQVVLA<br>VDTDQPCVAERAASGEAVEMTGS                    | α4C          |

|                         |            |                                 |                                                                                                                                         |       |
|-------------------------|------------|---------------------------------|-----------------------------------------------------------------------------------------------------------------------------------------|-------|
| CtAntR                  | A0A096F4H2 | 6UVU                            | MALEKRNELPACSLKPSLQDRDLITSAEAGEVVVLFKVLANDTRLRLLH<br>ALARSGGLCVTDLAAAVGMKPQAVSNQLQRLADRRLRAARCGNNIH<br>YRIVDPCVLRMLELGLCLIEEAEQQAGG     | α5    |
| <b>Arsenite-binding</b> |            |                                 |                                                                                                                                         |       |
| EcArsR                  | P15905     | /                               | MLQLTPLQLFKNLSDETRLGIVLLLREMGELCVCDLCMALDQSQPKISR<br>HLAMLRESGILLDRKQKGKVVHYRLSPHIPSWAAQIIEQAWLSQQDDVQ<br>VIARKLASVNCSSGSSKAVCI         | α3    |
| AfArsR                  | B7J952     | 6J05                            | MEPLQDPAQIVARLEALASPVRLIFRLLVEQEPTGLVSGDIAEHLGQPH<br>NGISFHLKNLQHAGLVTVQREGRYQRYRAAMPVVRALVAYLTENCCHG<br>TRDCALSGETRSPSVQEGNQ           | α5C   |
| CgArsR                  | A0A5H1ZR36 | 6J0E                            | MTTLHTIQLANPTECCTLATGPLSSDESEHYADLFKVLGDPVRLRILSQL<br>AAGCGPVSVELTDLMGLSQPTISHHLKMMTEAGFLDRVPEGRVVLH<br>RVRPELFAELRTVLQIGSMELLE         | α3N   |
| SpArsR                  | E6XPL1     | /                               | MNIADMNVADMNVENAAKVLKELGHPTRLALFRLLVKGGYTGVAVGQL<br>QEALQIPGSTLSHHISALMSAGIISQRREGRVLYCVPDYELLQGLVHFLQ<br>DQCCSGQ                       | α5    |
| BsAseR                  | P96677     | /                               | MTIDVAAMTRCLKTSLDQTRLIMMRLFLEQEYCVQQLVDMFEMSQPAIS<br>QHRLKLNAGFVNEDRRGQWRYYSSINGSCPEFDLQLILHQIDQEDEL<br>NHIKQKKTQACCQ                   | α3    |
| MtRv2642                | P71941     | /                               | MSNLHPLPEVASCVVAPLVREPLNPPAAAEMAARFKALADPVRLQLLSS<br>VASRAGGEACVCDISAGVEVSQPTISHHLKVLDRDAGLLTSRRRASWVYY<br>AVVPEALTVLSNLLSVHADAAPALGAPA | α3(N) |
| <b>Redox (?)</b>        |            |                                 |                                                                                                                                         |       |
| XfBigR                  | Q9PFB1     | 3PQJ, 3PQK                      | MVNEMRDDTRPHMTREDMEKRANEVANLLKTLSHPVRLMLVCTLVEGE<br>FSVGELEQQIGIQPTLSQQLGVLRESGIVETRRNIKQIFYRLTEAKAAQL<br>VNALYTIFCAQEKQA               | α2+α5 |
| RcSqrR                  | D5AT91     | 6O8K, 6O8L, 6O8M,<br>6O8N, 6O8O | MDTAQDPQDDFDPEMGSDDERCAALDAEEMATRARAASNLLKALAHE<br>GRLMIMCYLASGEKSVTELETRLSTRQAAVSQQLARLRLEGLVQSRREG<br>KTIYYSLSDPRAARVVQTVYEQFCSD      | α2+α5 |
| VcHlyU                  | A0A3Q0L222 | 3JTH, 5ZNX                      | MNLKDMEQNSAKAVVLLKAMANERRLQILCMLHNQELSVGELCAKLQLS<br>QSALSQHLAWLRRDGLVTRRKEAQTVYYTLKSEEVKAMIKLLHSLYCEE                                  | α2+α5 |
| VvHlyU                  | P52695     | 4OOI, 4K2E                      | MPYLKGAPMNLQEMEKNKSAKAVVLLKAMANERRLQILCMLLDNELSVGE<br>LSSRLELSQSALSQHLAWLRRDGLVNRKEAQTVFYTLSSSTEVKAMIELL<br>HRLYCQANQ                   | α2+α5 |
| EcYgaV                  | P77295     | 3CUO                            | MTELAQLQASAEQAAALLKAMSHPKRLLILCMLSGSPGTSAGELTRITGL<br>SASATSQHLARMRDEGLIDSQRDAQRILYSIKNEAVNAIIATLKNVYCP                                 | α2+α5 |
| CgCyeR                  | Q8NLA4     | /                               | MARKLEHPSLAEMNLNAIMFALSDPIRRQILSQLSCGHNDQACVAFELPV<br>SKSTSTHHFRVLREAGLITQRYEGTAILSALRSEDMEARFPGLLTSVMRA<br>EVEERNAADLPV                | ?     |

|              |            |                  |                                                                                                                                                                                                                          |            |
|--------------|------------|------------------|--------------------------------------------------------------------------------------------------------------------------------------------------------------------------------------------------------------------------|------------|
| NoRexT       | Q8YVV6     | This work        | MRFLYHPDRKDISLPGVLYALGDPARLEIVRLLASKGEQCCAEFDFAIKSTMSNHFKILRESGVVLRKEGTQHINRLRREDLETLPGLLDVLRSAQPL LTCQQSAIVK                                                                                                            | $\alpha$ 3 |
| <b>Other</b> |            |                  |                                                                                                                                                                                                                          |            |
| RfNoIR       | Q83TD2     | 4OMY, 4OMZ, 4ON0 | MEHAMQPLSPEKHEEAEIAAGFLSAMANPKRLLILDVKEEMAVGALANKVGLSQQSALSQHL SKLRAQNLVSTRRDAQTIYSSSSSDSVMKILGALS EIYGAATSVVIEKPFVRKSA                                                                                                  | ?          |
| BaPagR       | O31178     | 2ZKZ             | MTVFVDHKIEYMSLEDDAELLKTM AHPMRLKIVNELYKHKALNVTQIIQIL KLPQSTVSQHLCKMRGKVLKRN RQGLEIYYSINNPKEGIIKLLNPIQ                                                                                                                    | ?          |
| MtRv0081     | P9WMI7     | 6JMI             | MESEPLYKLAEFFKTLAHPARIRILELLVERDRSVGELLSSDVGLESSNLSQQLGVLRRAGVVAARRDGNAMIYSIAAPDIAELLAVARKVLARVLSDRVAVLEDLRAGGSAT                                                                                                        | ?          |
| MtRv2034     | O53478     | /                | MSTYRSPDRAWQALADGTRRAIVERLAHGPLAVGELARDLPVSRPAVSQHLKVLKTARLVCDRPA GTRRVYQLDPTGLAALRTDLDRFWTRALT GYAQLIDSEGDDT                                                                                                            | ?          |
| SrDepR2      | A0A2D1UFR6 | /                | MPENENAPRGEKTPHPRHPGDDDRKLTVDARTLRAIAHPLRIRLLNALREFGPATASKLGERLGESSGATSYHLRQLAESGLVEDAPELGKGRE RWWRAVHEGSIFESADFLAHTDPEVARGAIGVVMHEVATTHAQELNTW LGTMSEWPQEWQRQSSDMSDFKVR LTPELARELSAKLHAVVESYRDV VPEDTEGSAVVRTHLHTFPRPSE | ?          |
| PfHSR        | Q8U030     | 2P4W             | MGEELNRLLDV LGNETRRRILFLLTKRPYFVSELSRELGVGQKAVLEHL RILEEAGLIESRVEKIPRGRPRKYMIKKGLRLEILLTPTLFGSEMYEAK GVRKSPEYEQAKELIKSQEPINVKMRELAEFLHELNERIREIIEEKRELE EARILIETYIENTMRRLAEENRQIIIEIFRDIEKILPPGYARSLKEKFLNINI            | ?          |
| PH1932       | O59595     | 1ULY             | MAKKVKVITDPEVIKVMLEDTRRKILKLLRNKEMTISQLSEILGKTPQTIY HHIEKLKEAGLVEVKRTEMKGNLVEKYYGRTADV FYINLYLGDEELRYI ARSRLKTKIDIFKRLGYQFEENELLNIMDRMSQKEFDATVRISKYIEEKE DALKDFS NEDIIHAIEWLSTAE LARDEEYLELLKRLGSILKR                   | ?          |

Note: Regulatory residues are colored. Cyan: residues in the Asp/Glu and His-rich metal binding motifs; Green: residues in the Cys-rich metal-binding motifs; Pink: Cys residues that bind arsenite or methyl-arsenite; Purple: Cys residues that bind an RSS or an unknown species; Yellow: Cys residues that bind an ROS; Gray, residues that resembles above-mentioned conserved motifs but do not exhibit any function and are likely the remnant of evolution.

**Supplementary Table 5. 105 sequences of RexT-like regulators that may control Trx expression**

| UniProt ID | Organism                                | Taxonomic lineage                                                                         | Amino Acid Sequence                                                                                                                 |
|------------|-----------------------------------------|-------------------------------------------------------------------------------------------|-------------------------------------------------------------------------------------------------------------------------------------|
| A0A1Y0RN61 | Nostocales<br>cyanobacterium<br>HT-58-2 | Bacteria>Cyanobacteria>Nostocales                                                         | MRFLHHPDRKHISLAAVLYALGDPVRLIVRRLALEGEHCCADFD<br>FAIAKSTMSNHFKILRESGVVLSRKEGTQHINMLRKEDLEALFPGL<br>LDAVLRAAKPLSICSSSSQQTASQQF        |
| A0A1Z4GKH3 | Anabaenopsis<br>circularis NIES-<br>21  | Bacteria>Cyanobacteria>Nostocales<br>>Aphanizomenonaceae>Anabaenop<br>sis                 | MRFLYHPDKKDISLSAVLYALGDPVRLIVRLLATKGEQCCADFD<br>FAIAKSTMSNHFKILRESGVVLTTHKEGTQHINQLRREDLEMLFPGL<br>LEAVLRSAQPLFLCQKSMVNSQ           |
| A0A161VQF9 | Nodularia<br>spumigena<br>CENA596       | Bacteria>Cyanobacteria>Nostocales<br>>Aphanizomenonaceae>Nodularia                        | MKFLYHPDRKDISLPEVLYALGDPVRLIVRLLATEGEQCCAGFD<br>FAIAKSTMSNHFKILRESGVVLTTHKEGTQHINRLRQADLEAMFPG<br>LLDAVLQSAQPLRLYQQSTINTR           |
| A0A218Q2F8 | Nodularia sp.<br>NIES-3585              | Bacteria>Cyanobacteria>Nostocales<br>>Aphanizomenonaceae>Nodularia                        | MKFLYHPDRKDISLPGVLYALGDPVRLIVRLLASEGEQCCAGFD<br>FAIAKSTMSNHFKILRESGVVLTTHKEGTQHINRLRQEDLEALFPGL<br>LDAVLGSAQPFIFYQQSSVNSR           |
| A0ZIB8     | Nodularia<br>spumigena<br>CCY9414       | Bacteria>Cyanobacteria>Nostocales<br>>Aphanizomenonaceae>Nodularia                        | MKFLYHPDRKDISLPGVLYALGDPVRLIVRLLATQGEQCCAGFD<br>FAIAKSTMSNHFKILRESGVVLTTHKEGTQHINRLRQADLEAMFPG<br>LLDAVLQSAQPLRLYQQSTINTR           |
| A0A1Z4JT76 | Calothrix<br>brevisima<br>NIES-22       | Bacteria>Cyanobacteria>Nostocales<br>>Calotrichaceae>Calothrix                            | MRFLYHPDRKDITLVGVLYALGDPVRLIVRLLATKGEQCCAGFD<br>FAIAKSTMSNHFKILRESGVVLTTHKEGTQHINQLRREDLEARFPGL<br>LDAVLQSAQPLNICATAGKYGA           |
| A0A1Z4LZV3 | Calothrix<br>parasitica NIES-<br>267    | Bacteria>Cyanobacteria>Nostocales<br>>Calotrichaceae>Calothrix                            | MRFLYHPEQKNISLAGVLYALGDPVRLIVRQLATKKEQCCGDFD<br>FAIAKSTMSNHFKILRESGIVLTRKEGTQHINTLRIEDLEELFPGLL<br>EAILNSAQPFIIISGKEPVVSQ           |
| A0A2A2TC89 | Calothrix elsteri<br>CCALA 953          | Bacteria>Cyanobacteria>Nostocales<br>>Calotrichaceae>Calothrix                            | MRFLYHPDRKDMTLPVLYALGDPVRLIVRLLATRGEQCCAGF<br>DFAIAKSTMSNHFKILRESGVVLTTRKEGTQHINSLRRNDLDTLFPGL<br>LLNAILLAAQPLEICAAAKEAIAIANN       |
| A0A3S5K375 | Calothrix<br>desertica PCC<br>7102      | Bacteria>Cyanobacteria>Nostocales<br>>Calotrichaceae>Calothrix                            | MRFLYHPDQKDMTLAGVLYALGDPVRLIVRQLAVTGEQCCAGF<br>DFAIAKSTMSNHFKILRESGVVLTTRKEGTQHINTLRRNDLEVLFPGL<br>LLDAVLRSAQPLLEFTTTDREASREPAIASSN |
| K9UZI4     | Calothrix sp.<br>PCC 6303               | Bacteria>Cyanobacteria>Nostocales<br>>Calotrichaceae>Calothrix                            | MRFLYHPDRKDMTLAGVLYAFGDPVRLIVRQLATIGECCAGF<br>DFAIAKSTMSNHFKILRESGVVLTTRKEGTQHINTLRRDDLEILFPGL<br>LLDAVLRSAQPLPICEEAEVPLVSN         |
| A0A0T7BYV6 | Calothrix sp.<br>336/3                  | Bacteria>Cyanobacteria>Nostocales<br>>Calotrichaceae>Calothrix>unclassif<br>ied Calothrix | MRFLYHPDRKHISLAGVLYALGDPVRLIVRQLATRGEQCCAGFE<br>FAIAKSTMSNHFKILRESGVVWTRKEGTQHINSLRREELEVLFPGL<br>LLDAVLRSAQPMVNQESLVNS             |



|            |                                       |                                                                                   |                                                                                                                           |
|------------|---------------------------------------|-----------------------------------------------------------------------------------|---------------------------------------------------------------------------------------------------------------------------|
| A0A1Q4RSC0 | Calothrix sp. HK-06                   | Bacteria>Cyanobacteria>Nostocales>Calotrichaceae>Calothrix>unclassified Calothrix | MRFLYHPDQKDMTLAGVLYALGDPVRLEIVRQLAVAGEQCCAGFDFAIAKSTMSNHFILRESGVVLRKEGTQHINTLRRNDLEVLFPGLLDAVLRSALEPITTAERESREPAIASSN     |
| A0A1Z4FPD3 | Calothrix sp. NIES-2098               | Bacteria>Cyanobacteria>Nostocales>Calotrichaceae>Calothrix>unclassified Calothrix | MRFLYHPDRKDISLAGVLYALGDPVRLEIVRLLATKGEQCCAGFDFAIAKSTMSNHFILRESGVVLRTHKEGTQHINQLRREDLEALFPGLDAVLRSAQPLNICASADKQTASKV       |
| A0A1Z4H3E5 | Calothrix sp. NIES-2100               | Bacteria>Cyanobacteria>Nostocales>Calotrichaceae>Calothrix>unclassified Calothrix | MRFLYHPDRKDISLAGVLYALGDPVRLEIVRLLATKGEQCCAGFDFAIAKSTMSNHFILRESGVVLRTHKEGTQHINQLRREDLEALFPGLDAVLRSAQPLNICVSADKQTASKV       |
| A0A1Z4NEH8 | Calothrix sp. NIES-3974               | Bacteria>Cyanobacteria>Nostocales>Calotrichaceae>Calothrix>unclassified Calothrix | MRFLYHPDRKDISLAGVLYALGDPVRLEIVRQLATRGEQCCAGFDFAIAKSTMSNHFILRESGVVLRKEGTQHINILRRDDLNLFPGLLDAILASAQSSTGFPPEERQSQNGISVVGAVQ  |
| A0A1Z4R8I5 | Calothrix sp. NIES-4101               | Bacteria>Cyanobacteria>Nostocales>Calotrichaceae>Calothrix>unclassified Calothrix | MQGMFLYHPDRKDMALAGVLYALGDPVRLEIVRLLATKGEQCCAGFDFAIAKSTMSNHFILRESGVVLRKEGTQHINTLRRDDLETLFPGLLDAILRSAIPLEVCCASSKEVVGVGVAANN |
| A0A1Z4SLC9 | Calothrix sp. NIES-4105               | Bacteria>Cyanobacteria>Nostocales>Calotrichaceae>Calothrix>unclassified Calothrix | MRFLYHPDQKDMTLAGVLYALGDPVRLEIVRQLAVTGEQCCAGFDFAIAKSTMSNHFILRESGVVLRKEGTQHINTLRRNDLEVLFPGLLDAVLRSAHPMEITTATDREPAIASSN      |
| A0A2H2X5M9 | Calothrix sp. NIES-4071               | Bacteria>Cyanobacteria>Nostocales>Calotrichaceae>Calothrix>unclassified Calothrix | MRFLYHPDQKDMTLAGVLYALGDPVRLEIVRQLAVTGEQCCAGFDFAIAKSTMSNHFILRESGVVLRKEGTQHINTLRRNDLEVLFPGLLDAVLRSAHPMEITTATDREPAIASSN      |
| K9PML9     | Calothrix sp. PCC 7507                | Bacteria>Cyanobacteria>Nostocales>Calotrichaceae>Calothrix>unclassified Calothrix | MRFLYHPDRKDISLPGVLYALGDPVRLEIVRLLATKGEQCCADFDFAIAKSTMSNHFILRESGVVLSRKEGTQHINKLRFEDLDMLFPGLDAVLRSAKPLGVCPSSVIGNRQIGK       |
| A0A3S1AN91 | Chlorogloeopsis fritschii PCC 6912    | Bacteria>Cyanobacteria>Nostocales>Chlorogloeopsidaceae>Chlorogloeopsis            | MRFLYHPERKNIYLTGVLYALGDPVRLEIVRQLAAKGEQCCADFDFAIAKSTMSNHFILRESGVVWTRKEGTQHINSLRREDLEVLFPGLLDVVLRSAPLMSQESTVISH            |
| A0A1Z4UDG5 | Aulosira laxa NIES-50                 | Bacteria>Cyanobacteria>Nostocales>Fortiaceae>Aulosira                             | MRFLYHPDRKDISLAGVLYALGDPVRLEIVRLLATQGGKQCCAGFDFAIAKSTMSNHFILRESGVVLRTHKEGTQHINSLRREDLEALFPGLDAVLRSAQPLNICITSANKQTASKVS    |
| A0A328I829 | Hapalosiphonaceae cyanobacterium JJU2 | Bacteria>Cyanobacteria>Nostocales>Hapalosiphonaceae                               | MRFLYHPEQQHISLAGVLYALGDPVRLEIVRQLAVKGEQCCADFDFAIAKSTMSNHFILRESGVVWTRKEGTQHINSLRREGLEELFPGLLDVVLRSQPPLITQESMVKSH           |
| A0A0S3TLG6 | Fischerella sp. NIES-3754             | Bacteria>Cyanobacteria>Nostocales>Hapalosiphonaceae>Fischerella                   | MRFLFHPEQKHISLAGVLYALGDPVRLEIVRQLATKGEQCCADFDFAIAKSTMSNHFILRESGVVWTRKEGTQHINSLRREDLEQLFPGLLDVVLRSAPPLSQESMLKSR            |
| A0A1U7H1B7 | Fischerella major NIES-592            | Bacteria>Cyanobacteria>Nostocales>Hapalosiphonaceae>Fischerella                   | MRFLFHPEQKHISLAGVLYALGDPVRLEIVRQLATKGEQCCADFDFAIAKSTMSNHFILRESGVVWTRKEGTQHINSLRREDLEQLFPGLLDVVLRSAPPLSQESMLKSR            |

|            |                                          |                                                                                                    |                                                                                                                              |
|------------|------------------------------------------|----------------------------------------------------------------------------------------------------|------------------------------------------------------------------------------------------------------------------------------|
| A0A1Z4TTY8 | Fischerella sp.<br>NIES-4106             | Bacteria>Cyanobacteria>Nostocales<br>>Hapalosiphonaceae>Fischerella                                | MRFLYHPEQQHISLAGVLYALGDPVRLEIVRQLALKGEQCCADF<br>DFAIAKSTMSNHFILRESGVVWTRKEGTQHINSLRREDLEESFP<br>GLLDVVLRAAQPLMIQESMVKNN      |
| A0A2N6K1N1 | Fischerella<br>muscolicola<br>CCMEE 5323 | Bacteria>Cyanobacteria>Nostocales<br>>Hapalosiphonaceae>Fischerella                                | MRFLFHPEQKHISLAGVLYALGDPVRLEIVRQLATKGEQCCADF<br>DFAIAKSTMSNHFILRESGVVWTRKEGTQHINSLRREDLEQLFPG<br>LLDVVLRSAQPLLSQESMLKSR      |
| A0A2N6K9Y8 | Fischerella<br>thermalis<br>CCMEE 5268   | Bacteria>Cyanobacteria>Nostocales<br>>Hapalosiphonaceae>Fischerella                                | MRFLFHPEQKHISLAGVLYALGDPVRLEIVRQLATKGEQCCADF<br>DFAIAKSTMSNHFILRESGVVWTRKEGTQHINSLRREDLEQLFPG<br>LLDAVLRSAQPLLSQESMLKSR      |
| A0A2N6KVH3 | Fischerella<br>thermalis<br>CCMEE 5273   | Bacteria>Cyanobacteria>Nostocales<br>>Hapalosiphonaceae>Fischerella                                | MRFLFHPEQKHISLAGVLYALGDPVRLEIVRQLATKGEQCCADF<br>DFAIAKSTMSNHFILRESGVVWTRKEGTQHINSLRREDLEQLFPG<br>LLDVVLRSAQPLLSQESMLKSR      |
| A0A2N6LCH9 | Fischerella<br>thermalis<br>CCMEE 5318   | Bacteria>Cyanobacteria>Nostocales<br>>Hapalosiphonaceae>Fischerella                                | MRFLFHPEQKHISLAGVLYALGDPVRLEIVRQLATKGEQCCADF<br>DFAIAKSTMSNHFILRESGVIWTRKEGTQHINSLRREDLEQLFPG<br>LDAVLRSAQPLLSQESMLKSR       |
| A0A2N6LYB7 | Fischerella<br>thermalis<br>CCMEE 5205   | Bacteria>Cyanobacteria>Nostocales<br>>Hapalosiphonaceae>Fischerella                                | MRFLFHPEQKHISLAGVLYALGDPVRLEIVRQLATKGEQCCADF<br>DFAIAKSTMSNHFILRESGVIWTRKEGTQHINSLRREDLEQLFPG<br>LDAVLRSAQPLLSQESMLKSR       |
| A0A2N6MBZ3 | Fischerella<br>thermalis<br>CCMEE 5201   | Bacteria>Cyanobacteria>Nostocales<br>>Hapalosiphonaceae>Fischerella                                | MRFLFHPEQKHISLAGVLYALGDPVRLEIVRQLATKGEQCCADF<br>DFAIAKSTMSNHFILRESGVVWTRKEGTQHINSLRREDLEQLFPG<br>LLDAVLRSAQPLLSQESMLKSR      |
| A0A2N6MDS7 | Fischerella<br>thermalis<br>CCMEE 5330   | Bacteria>Cyanobacteria>Nostocales<br>>Hapalosiphonaceae>Fischerella                                | MRFLFHPEQKHISLAGVLYALGDPVRLEIVRQLATKGEQCCADF<br>DFAIAKSTMSNHFILRESGVVWTRKEGTQHINSLRREDLEQLFPG<br>LLDVVLRSAQPLLSQESMLKSR      |
| A0A0M0SU60 | Hapalosiphon<br>sp. MRB220               | Bacteria>Cyanobacteria>Nostocales<br>>Hapalosiphonaceae>Hapalosiphon<br>>unclassified Hapalosiphon | MRLLYHPEQKHISLAGVLYALGDPVRLEIVRQLAVKGEQCCADF<br>DFAIAKSTMSNHFILRESGVIWTRKEGTQHINSLRREDLEKLFPG<br>LLDVVLRSAQPLMSQESMVTTIQN    |
| A0A4D9CHS4 | Mastigocladus<br>laminosus<br>UU774      | Bacteria>Cyanobacteria>Nostocales<br>>Hapalosiphonaceae>Mastigocladus                              | MRFLYHPEQQHISLAGVLYALGDPVRLEIVRQLAVKGEQCCADF<br>DFAIAKSTMSNHFILRESGVIWTRKEGTQHINSLRREDLEELFPG<br>LLDVVLRSPQPLITQESMVKSH      |
| A0A0V7ZSD4 | Mastigocoleus<br>testarum BC008          | Bacteria>Cyanobacteria>Nostocales<br>>Hapalosiphonaceae>Mastigocoleus                              | MRFLYHPDQRDITLPGVLYALGDPVRLEIVRLLAEKGEQCCADF<br>DFAIAKSTMSNHFILRESGVVWTRKEGTQHINKLRR<br>QDLEGLFPGLEAVLSSAKPLATSQGELTKQAASSFG |
| A0A4V2JNZ2 | Westiellopsis<br>prolifera IICB1         | Bacteria>Cyanobacteria>Nostocales<br>>Hapalosiphonaceae>Westiellopsis                              | MRFLYHPEQQHISLAGVLYALGDPVRLEIVRQLAVKGEQCCADF<br>DFAIAKSTMSNHFILRESGVIWTRKEGTQHINSLRREDLEELFPG<br>LLDVVLRSPQPLITQESMVKSH      |
| A0A1W5CB68 | Anabaena sp.<br>39858                    | Bacteria>Cyanobacteria>Nostocales<br>>Nostocaceae>Anabaena>Unclassified<br>Anabaena                | MRFLYHPDRKDISLPGVLYALGDPARLEIVRLLASKGEQCCA<br>EFDFAIAKSTMSNHFILRESGVVWTRKEGTQHINRLRYEDLEALFPG<br>LDAVLRSAQPLLTCCQSVIVK       |

|            |                                                            |                                                                                                |                                                                                                                                      |
|------------|------------------------------------------------------------|------------------------------------------------------------------------------------------------|--------------------------------------------------------------------------------------------------------------------------------------|
| A0A5Q0GAJ5 | Anabaena sp.<br>YBS01                                      | Bacteria>Cyanobacteria>Nostocales<br>>Nostocaceae>Anabaena>Unclassified Anabaena               | MRFLYHPDRKDISLPGVLYALGDPARLEIVRLLASKGEQCCA EFD<br>FAIAKSTMSNHFKILRESGVVLRKEGTQHINRLRYEDLEALFPGL<br>LDAVLRSAQPLLTCCQQSVIVK            |
| K9WYV3     | Cylindrospermum<br>stagnale PCC<br>7417                    | Bacteria>Cyanobacteria>Nostocales<br>>Nostocaceae>Cylindrospermum                              | MRFLYHPDRKDI CLPGVLYALGDPVRLEIVRLLATKGEQCCA EFN<br>FAIAKSTMSNHFKILRESGVVLRTHKEGTQHINQLR CEDLEALFPGL<br>LGAVLRSAQPLLVESSTVKKSVSQMW    |
| A0A1Z4QTA1 | Cylindrospermum<br>sp. NIES-<br>4074                       | Bacteria>Cyanobacteria>Nostocales<br>>Nostocaceae>Cylindrospermum>unclassified Cylindrospermum | MRFLYHPDRKDISLPGVLYALGDPVRLEIVRLLATEGEQCCAGFD<br>FAIAKSTMSNHFKILRESGVVLRKEGTHHINQLRSGDLEALFPGL<br>LDAVLQSTQPLCVSPSTAKQGV SQMR        |
| A0A0M4SSD5 | Nostoc piscinale<br>CENA21                                 | Bacteria>Cyanobacteria>Nostocales<br>>Nostocaceae>Nostoc                                       | MRFLYHPDRKDISLPAVLYALGDPVRLEIVRLLASKGEQCCADFD<br>FAIAKSTMSNHFKILRESGVVLRTHKEGTQHINQLRREDLELLFPGL<br>LEAVLRSAQPLLFQKSMASQ             |
| A0A1C0VHB2 | Nostoc sp. MBR<br>210                                      | Bacteria>Cyanobacteria>Nostocales<br>>Nostocaceae>Nostoc                                       | MRFLYHPDRKDISLPAVLYALGDPVRLEIVRLLASKGEQCCADFD<br>FAIAKSTMSNHFKILRESGVVLRTHKEGTQHINQLRREDLELLFPGL<br>LEAVLRSAQPLLCQKSMVKSQ            |
| A0A1E2WIY2 | Nostoc sp.<br>KVJ20                                        | Bacteria>Cyanobacteria>Nostocales<br>>Nostocaceae>Nostoc                                       | MRFLYHPDRKNISLPGVLYALGDPVRLEIVRLLATEGEQCCARFD<br>FAIAKSTMSNHFKILRESGMVTRKEGTQHINILRREDLEMLFPGL<br>LDAVLKAAQPLPVVPASAKQTASRI          |
| A0A1U7I345 | Nostoc calcicola<br>FACHB-389                              | Bacteria>Cyanobacteria>Nostocales<br>>Nostocaceae>Nostoc                                       | MRFLYHPDRKNISLPGVLYALGDPVRLEIVRLLASEGEQCCARFD<br>FAIAKSTMSNHFKILRESGVVTRKEGTQHINILRREDLEMLFPGL<br>LDAVLKAAQPLSVDPASTKQTASTRGRGQGW    |
| A0A1Z4HQ07 | Nostoc carneum<br>NIES-2107                                | Bacteria>Cyanobacteria>Nostocales<br>>Nostocaceae>Nostoc                                       | MRFLYHPDRKDISLAGVLYALGDPVRLEIVRLLATQGGKQCCAGFD<br>FAIAKSTMSNHFKILRESGVVLRTHKEGTQHINSLRREDLEALFPGL<br>LDAVLRSAQPLNICTSANKQTASKVS      |
| A0A1Z4ICG4 | Nostoc sp.<br>NIES-2111                                    | Bacteria>Cyanobacteria>Nostocales<br>>Nostocaceae>Nostoc                                       | MRFLYHPDRKDILLPGVLYALGDPVRLEIVRLLATKGEQCCADFD<br>FAIAKSTMSNHFKILRESGVVMTRKEGTQHINRLR CEDLEVLFPGL<br>LLEAVLRSAQPLLICQQSIVVK           |
| A0A1Z4L2J2 | Nostoc linckia<br>NIES-25                                  | Bacteria>Cyanobacteria>Nostocales<br>>Nostocaceae>Nostoc                                       | MRFLYHPDRKNISLPGVLYALGDPVRLEIVRLLASEGEQCCAKFD<br>FAIAKSTMSNHFKILRESGVVTRKEGTQHINILRREDLEMLFPGL<br>LDAVLKAAARPLCVDPATTRQTASTKVG       |
| A0A1Z4S5G4 | Nostoc sp.<br>NIES-4103                                    | Bacteria>Cyanobacteria>Nostocales<br>>Nostocaceae>Nostoc                                       | MRFLYHPDRKNISLPGVLYALGDPVRLEIVRLLATKGEQCCA EFD<br>FAIAKSTMSNHFKILRESGVVLRTHKEGTQHINQLRREDLEALFPGL<br>LDAVLRSAQPLMICNQSKVPVKV VQRQSDR |
| A0A235HTK1 | Nostoc sp.<br>'Peltigera<br>membranacea<br>cyanobiont' 213 | Bacteria>Cyanobacteria>Nostocales<br>>Nostocaceae>Nostoc                                       | MRFLYHPDRKNISLPGVLYALGDPVRLEIVRLLATEGEQCCA QFD<br>FAIAKSTMSNHFKILRESGIVLRKEGTHHINILRREDLEMLFPGL<br>DAVLKAAQPLSICPGTKQTASRI           |
| A0A235HY70 | Nostoc sp.<br>'Peltigera<br>membranacea                    | Bacteria>Cyanobacteria>Nostocales<br>>Nostocaceae>Nostoc                                       | MRFLYHPDRKNISLPGVLYALGDPVRLEIVRLLATEGEQCCA KFD<br>FAIAKSTMSNHFKILRESGIVLRKEGTHHINILRREDLEVLFPGL<br>DVVLKAAQPLPVEPASTKQTASRI          |

|            |                                                               |                                                          |                                                                                                                                     |
|------------|---------------------------------------------------------------|----------------------------------------------------------|-------------------------------------------------------------------------------------------------------------------------------------|
|            | cyanobiont'<br>210A                                           |                                                          |                                                                                                                                     |
| A0A235IS72 | Nostoc sp.<br>'Peltigera<br>membranacea<br>cyanobiont' 232    | Bacteria>Cyanobacteria>Nostocales<br>>Nostocaceae>Nostoc | MRFLYHPDRKNISLPGVLYALGDPVRLEIVRLLATEGEQCCAQFD<br>FAIAKSTMSNHFKILRESGIVFTRKEGTHHINILRREDLEMLFPGL<br>DAVLKAAQPLPVSPASDKQTVSRI         |
| A0A252DG98 | Nostoc sp. T09                                                | Bacteria>Cyanobacteria>Nostocales<br>>Nostocaceae>Nostoc | MRFLYHPDRKDISLAGVLYALGDPVRLEIVRLLATQGEQCCAGFD<br>FAIAKSTMSNHFKILRESGVVLTHTKEGTQHINRLRREDLEALFPGL<br>LDAVLQSAQPLNICASADKQTASTA       |
| A0A252DU84 | Nostoc sp.<br>RF31YmG                                         | Bacteria>Cyanobacteria>Nostocales<br>>Nostocaceae>Nostoc | MRFLYHPDRKDISLAGVLYALGDPVRLEIVRLLATQGEQCCAGFD<br>FAIAKSTMSNHFKILREAGVLTHTKEGTQHINRLRREDLEVLFPGL<br>LDAVLQSAQPLNICASAAQQTASQV        |
| A0A252E5W4 | Nostoc sp. 106C                                               | Bacteria>Cyanobacteria>Nostocales<br>>Nostocaceae>Nostoc | MRFLYHPDRKDISLAGVLYALGDPVRLEIVRLLATQGEQCCAGFD<br>FAIAKSTMSNHFKILREAGVLTHTKEGTQHINRLRREDLEVLFPGL<br>LDAVLQSAQPLNICASADQQTASQV        |
| A0A2C6W6J5 | Nostoc linckia<br>z16                                         | Bacteria>Cyanobacteria>Nostocales<br>>Nostocaceae>Nostoc | MRFLYHPDRKNISLPGVLYALGDPVRLEIVRLLASEGEQCCARFD<br>FAIAKSTMSNHFKILRESGVVFTTRKEGTQHINMLRREDLEMLFPG<br>LLDAVLKAAQPLSVDSSSSKQTASSTSRRLGW |
| A0A2H6LDX9 | Nostoc cycadae<br>WK-1                                        | Bacteria>Cyanobacteria>Nostocales<br>>Nostocaceae>Nostoc | MRFLYHPDKKDISLSAVLYALGDPVRLEIVRLLATKGEQCCADFD<br>FAIAKSTMSNHFKILRESGVVLTHTKEGTQHINQLRREDLQMLFPG<br>LLEAVLRSAPLFLCQKSMVNSQ           |
| A0A2I8AG27 | Nostoc sp.<br>CENA543                                         | Bacteria>Cyanobacteria>Nostocales<br>>Nostocaceae>Nostoc | MKFLYHPDRKDITLPGVLYALGDPVRLEMVCLLAAKGEQCCGDF<br>DFAIAKSTMSNHFKILRESGVVFSRKEGTQHINRLRQEELF<br>GLLDVLRSAKSIVNSQ                       |
| A0A2K8T0K6 | Nostoc<br>flagelliforme<br>CCNUN1                             | Bacteria>Cyanobacteria>Nostocales<br>>Nostocaceae>Nostoc | MRFLYHPDRKNISLPGVLYALGDPVRLEIVRRLATEGEQCCASFD<br>FAIAKSTMSNHFKILRESGIVLTRKEGTQHINILRREDLEVLFPGL<br>DAILKAAQPLPVSPASIKQTASRN         |
| A0A2L2NET1 | Nostoc sp.<br>'Peltigera<br>membranacea<br>cyanobiont' N6     | Bacteria>Cyanobacteria>Nostocales<br>>Nostocaceae>Nostoc | MRFLYHPDRKNISLPGVLYALGDPVRLEIVRLLATEGEQCCAQFD<br>FAIAKSTMSNHFKILRESGIVLTRKEGTHHINILRREDLEMLFPGL<br>DAVLKAAQPLSICPGTKQTASRI          |
| A0A2L2NQS8 | Nostoc sp.<br>'Lobaria<br>pulmonaria<br>(5183)<br>cyanobiont' | Bacteria>Cyanobacteria>Nostocales<br>>Nostocaceae>Nostoc | MRFLYHPDRKNISLPGVLYALGDPVRLEIVRLLATEGEQCCAQFD<br>FAIAKSTMSNHFKILRESGIVFTRKEGTHHINILRREDLETLFPGL<br>DAVLKAAQPLPVSSVSDKQTASRI         |
| A0A2R5FQ90 | Nostoc<br>commune NIES-<br>4072                               | Bacteria>Cyanobacteria>Nostocales<br>>Nostocaceae>Nostoc | MRFLYHPDRKNISLPGVLYALGDPVRLEIVRRLATEGEQCCASFD<br>FAIAKSTMSNHFKILRESGIVFTRKSGTQHINILRREDLEVLFPGL<br>DAILKAAQPLPVSPASTKQTASRI         |

|            |                                                      |                                                          |                                                                                                                                |
|------------|------------------------------------------------------|----------------------------------------------------------|--------------------------------------------------------------------------------------------------------------------------------|
| A0A2Z6CMH7 | Nostoc sp. HK-01                                     | Bacteria>Cyanobacteria>Nostocales>Nostocaceae>Nostoc     | MRFLYHPDKKDISLSAVLYALGDPVRLEIVRLLATKGEQCCADFD<br>FAIAKSTMSNHFKILRESGVVLTHKEGTQHINQLRREDLEMLFPGL<br>LEAVLRSAQPLFLCQKSMVNSQ      |
| A0A367QMX8 | Nostoc sp. ATCC 43529                                | Bacteria>Cyanobacteria>Nostocales>Nostocaceae>Nostoc     | MRFLYHPDRKNISLPGVLYALGDPVRLEIVRLLASEGEQCCARFD<br>FAIAKSTMSNHFKILRESGVVFTTRKEGTQHINILRREDLEMLFPGL<br>LDAVLKAAQPLSVDPTSSKQTASTKV |
| A0A367RM59 | Nostoc punctiforme NIES-2108                         | Bacteria>Cyanobacteria>Nostocales>Nostocaceae>Nostoc     | MRFLYHPDRKNISLPGVLYALGDPVRLEIVRLLATEGEQCCAKFD<br>FAIAKSTMSNHFKILRESGIVLTRKEGTHHINILRREDLEVLFPGLL<br>DVVLKAAQPLPVSPVSTKQIASRI   |
| A0A367RP87 | Nostoc minutum NIES-26                               | Bacteria>Cyanobacteria>Nostocales>Nostocaceae>Nostoc     | MRFLYHPDRKDISLPGVLYALGDPVRLEIVRLLATKGEQCCAefd<br>FAIAKSTMSNHFKILRESGVVLTHKEGTQHINQLRHEDLEALFPGL<br>LDAVLRSAQPLLVCHQSTVNSR      |
| A0A5P8VUG6 | Nostoc sphaeroides CCNUC1                            | Bacteria>Cyanobacteria>Nostocales>Nostocaceae>Nostoc     | MKFLYHPDRKNISLPGVLYALGDPVRLEIVRRLATEGEQCCASFD<br>FAIAKSTMSNHFKILRESGIVLTRKEGTHHINMLRREDLEVLFPPELL<br>DAILKAAQPLPIEPASTKQAFRI   |
| A0A6P1KRA4 | Nostoc sp. ATCC 53789                                | Bacteria>Cyanobacteria>Nostocales>Nostocaceae>Nostoc     | MRFLYHPDRKNISLPGVLYALGDPVRLEIVRLLATEGEQCCAKFD<br>FAIAKSTMSNHFKILRESGIVFTRKEGTHHINILRREDLEMLFPGLL<br>DAVLKAAQPLPVSPASDKQTASRI   |
| B2IWZ7     | Nostoc punctiforme (strain ATCC 29133 / PCC 73102)   | Bacteria>Cyanobacteria>Nostocales>Nostocaceae>Nostoc     | MRFLYHPDRKNISLPGVLYALGDPVRLEIVRLLATEGEQCCAQFD<br>FAIAKSTMSNHFKILRESGIVFTRKEGTHHINILRREDLEVLFPGLL<br>DAVLKAAQPLPVSPASDKQTASRV   |
| K9Q8R8     | Nostoc sp. PCC 7107                                  | Bacteria>Cyanobacteria>Nostocales>Nostocaceae>Nostoc     | MRFLYHPDKKDISLSAVLYALGDPVRLEIVRLLATKGEQCCADFD<br>FAIAKSTMSNHFKILRESGVVLTHKEGTQHINQLRREDLEMLFPGL<br>LEAVLRSAQPLFLCQKSMVKSQ      |
| K9QTD2     | Nostoc sp. (strain ATCC 29411 / PCC 7524)            | Bacteria>Cyanobacteria>Nostocales>Nostocaceae>Nostoc     | MKFLYHPDRKNISLPGVLYALGDPVRLEIVRLLATKGEQCCADFD<br>FAIAKSTMSNHFKILRESGVVLSRKEGTQHINKLRKEDLEALFPGL<br>LDAVLRSAQPLLVCC             |
| Q8YVV6     | Nostoc sp. (strain PCC 7120 / SAG 25.82 / UTEX 2576) | Bacteria>Cyanobacteria>Nostocales>Nostocaceae>Nostoc     | MRFLYHPDRKDISLPGVLYALGDPARLEIVRLLASKGEQCCAefd<br>FAIAKSTMSNHFKILRESGVVLTRKEGTQHINRLRREDLETLFPGL<br>LDAVLRSAQPLLVCCQSAIVK       |
| A0A1Z4KEV0 | Trichormus variabilis NIES-23                        | Bacteria>Cyanobacteria>Nostocales>Nostocaceae>Trichormus | MRFLYHPDRKDISLPGVLYALGDPARLEIVRLLASKGEQCCAefd<br>FAIAKSTMSNHFKILRESGVVLTRKEGTQHINRLRREDLETLFPGL<br>LDAVLRSAQPLLVCCQSAIVK       |

|            |                                                      |                                                                                           |                                                                                                                                    |
|------------|------------------------------------------------------|-------------------------------------------------------------------------------------------|------------------------------------------------------------------------------------------------------------------------------------|
| Q3M3S7     | Trichormus variabilis (strain ATCC 29413 / PCC 7937) | Bacteria>Cyanobacteria>Nostocales >Nostocaceae>Trichormus                                 | MRFLYHPDRKDISLPGVLYALGDPARLEIVRLLASKGEQCCA EFD<br>FAIAKSTMSNHFKILRESGVVLTTRKEGTQHINRLRYEDLEALFPGL<br>LDAVLRSAQPLLTCCQQSVIVK        |
| A0A1Z4M5J8 | Fremyella diplosiphon NIES-3275                      | Bacteria>Cyanobacteria>Nostocales >Rivulariaceae>Microchaete                              | MRFLYHPDRKDISLAGVLYALGDPVRLEIVRLLATQGGQCCAGFD<br>FAIAKSTMSNHFKILRESGVVLTTHKEGTQHINRLRREDLEALFPGL<br>LDAVLRSAQPLNICASANKQTASKVS     |
| K9R5Y5     | Rivularia sp. PCC 7116                               | Bacteria>Cyanobacteria>Nostocales >Rivulariaceae>Rivularia>unclassified Rivularia         | MRFLYHPEQKNISLAGVLYALGDPVRLEIVRQLAKKKEQCCGDFD<br>FAIAKSTMSNHFKILRESGVVLTTRKEGTQHINTLRTEDEELFPGL<br>LEAVLNSAQPFVIAQEAVKQTV          |
| A0A0C2Q9A4 | Scytonema tolypothrichoides VB-61278                 | Bacteria>Cyanobacteria>Nostocales >Scytonemataceae>Scytonema                              | MRFLHHPDRKHISLAGVLYALGDPVRLEIVRRLAVKEEQCCADFD<br>FAIAKSTMSNHFKILRESGVVLTTRKEGTQHINMLRKEDLDALFPGL<br>LDAVLRSAKPLSAKIRQENVIGSSTEPM   |
| A0A139WRQ0 | Scytonema hofmannii PCC 7110                         | Bacteria>Cyanobacteria>Nostocales >Scytonemataceae>Scytonema                              | MKFLYHPDKKNISLPGVLYALGDPVRLEIVRRLATEGEQCCGDFD<br>FAIAKSTMSNHFKILRESGVILTRKEGTQHINILRREDLELLFPELLD<br>VVLRSAPLQLTMSRGLGIGDWG        |
| A0A1Z4IW70 | Scytonema sp. HK-05                                  | Bacteria>Cyanobacteria>Nostocales >Scytonemataceae>Scytonema>unclassified Scytonema       | MRLLYHPDRKHISLAGVLYALGDPVRLEIVRRLATQGEHCCADFD<br>FAIAKSTMSNHFKILRESGVVLTTRKEGTQHINMLRTEDEELFPGL<br>LDAVLRSAKPLCVGSSSYQKAGSQQVL     |
| A0A1Z4Q644 | Scytonema sp. NIES-4073                              | Bacteria>Cyanobacteria>Nostocales >Scytonemataceae>Scytonema>unclassified Scytonema       | MRLLYHPDRKHISLAGVLYALGDPVRLEIVRRLATKGEHCCADFD<br>FAIAKSTMSNHFKILRESGVVLTTRKEGTQHINMLRTEDELDALFPGL<br>LDAVLRSAKPLCVGSSSYQKAGSQ      |
| A0A0C1N473 | Tolypothrix bouteillei VB521301                      | Bacteria>Cyanobacteria>Nostocales >Tolypothrichaceae>Tolypothrix                          | MKFLYHPDKKNISLPGVLYALGDPVRLEIVRRLATEGEQCCGDFD<br>FAIAKSTMSNHFKILRESGVILTRKEGTQHINILRREDLELLFPELLD<br>VVLRSAPLQLTVSRGLSVGDWG        |
| A0A0C2QBQ3 | Tolypothrix campylonemoides VB511288                 | Bacteria>Cyanobacteria>Nostocales >Tolypothrichaceae>Tolypothrix                          | MRLLYHPDRKHISLA AVL YALGDPVRLEIVRRLATQGEHCCADFD<br>FAIAKSTMSNHFKILRESGVVLTTRKEGTQHINMLRTEDELDALFPGL<br>LDAVLRSAKPLCVGSSSYQKAGSQQVF |
| A0A1Z4MZ9  | Tolypothrix tenuis PCC 7101                          | Bacteria>Cyanobacteria>Nostocales >Tolypothrichaceae>Tolypothrix                          | MRFLYHPDRKDISLAGVLYALGDPVRLEIVRLLATQGGQCCAGFD<br>FAIAKSTMSNHFKILRESGVVLTTHKEGTQHINSLRREDLEALFPGL<br>LDAVLRSAQPLNICTSANKQTASKVS     |
| A0A0D6KPE7 | Tolypothrix sp. PCC 7601                             | Bacteria>Cyanobacteria>Nostocales >Tolypothrichaceae>Tolypothrix>unclassified Tolypothrix | MRFLYHPDRKDISLAGVLYALGDPVRLEIVRLLATQGGQCCAGFD<br>FAIAKSTMSNHFKILRESGVVLTTHKEGTQHINRLRREDLEALFPGL<br>LDAVLRSAQPLNICASANKQTASKVS     |
| A0A218QHS2 | Tolypothrix sp. NIES-4075                            | Bacteria>Cyanobacteria>Nostocales >Tolypothrichaceae>Tolypothrix>unclassified Tolypothrix | MRFLYHPDRKDISLSGVLYALGDPVRLEIVRLLATVGAQPCAGFD<br>FAIAKSTMSNHFKILRESGVVFTTRKEGTQHINMLRRQDIDELFPGL<br>LDAVLRSAQPMQICQEGTAVKSVSL      |
| B0C3H5     | Acaryochloris marina (strain MBIC 11017)             | Bacteria>Cyanobacteria>Synechococcales>Acaryochloridaceae>Acaryochloris                   | MRLDIVNQLAASGELTCNAFDCEIAKSTLSHHFKILRESGVIYSRK<br>EGTQHLNLSLRREELDNLFPGLLASVLSASA                                                  |

|            |                                               |                                                                                                        |                                                                                                                                 |
|------------|-----------------------------------------------|--------------------------------------------------------------------------------------------------------|---------------------------------------------------------------------------------------------------------------------------------|
| A0A2W1K015 | Acaryochloris sp. RCC1774                     | Bacteria>Cyanobacteria>Synechococcales>Acaryochloridaceae>Acaryochloris>unclassified Acaryochloris     | MKLLYHPDCSQISLAGVLYALGDPVRLQVVQQLAADGELTCNAFD<br>CDVAKSTMSHHFKILRESGVIRSRKEGTQHVNSLRQDELQELF<br>PGLLDAVLQSSACGAVTG              |
| A0A2W7A0F1 | Leptolyngbya sp.                              | Bacteria>Cyanobacteria>Synechococcales>Leptolyngbyaceae>Leptolyngbya                                   | MRPIHPNCQDIALEGVLYALGDPVRLQVRLAANHELSCSDLD<br>LGVAKSTLSHHFKILREAGVLHCRKQGTQHMNSLRDDLEAAFP<br>GLLDTILQAAQGIKGD                   |
| A0A2W7BWP3 | Leptolyngbya sp.                              | Bacteria>Cyanobacteria>Synechococcales>Leptolyngbyaceae>Leptolyngbya                                   | MRPIHPNCQDIALEGVLYALGDPVRLQVRLAANDELCCSDLD<br>LGVAKSTLSHHFKILREAGVLHCRKQGTQHMNSLRDDLEAAFP<br>GLLDSILKAAQTQVER                   |
| A0A3M9Z491 | Leptolyngbya sp. IPPAS B-1204                 | Bacteria>Cyanobacteria>Synechococcales>Leptolyngbyaceae>Leptolyngbya                                   | MRLLYHPNQKDISLAGVLYALGDPVRLQVRLAANDELCCSDLD<br>CDVPKSTMSHHLRVLREAGVLRCKRKEGTQHINSLRQSDLDLFLP<br>GLLEVLRSMRPPALDGLPDAVATSLSIGANP |
| K9EQK9     | Leptolyngbya sp. PCC 7375                     | Bacteria>Cyanobacteria>Synechococcales>Leptolyngbyaceae>Leptolyngbya                                   | MRPISHPDTNQITLAEVLYALGDPVRLKIVKTIAQKGEQACRSCG<br>GDEIAKSTLSHHFKILREAGIVHTEKVGTLHNSLRVDELEAKFPG<br>VLASVLAADDGEVCEE              |
| U9VKF5     | Leptolyngbya sp. Heron Island J               | Bacteria>Cyanobacteria>Synechococcales>Leptolyngbyaceae>Leptolyngbya                                   | MRPIFHPDTTQITLADVLYALGDPVRLKIVKTIAQKGEQACRSCGG<br>DDIAKSTLSHHFKILREAGIVHTQKVGTLHNSLRRLDELEARFPGV<br>LPSVLAATDIEVCEDE            |
| A0A2T1ES82 | Stenomitos frigidus ULC18                     | Bacteria>Cyanobacteria>Synechococcales>Leptolyngbyaceae>Stenomitos                                     | MRLLYHPDKKELSLAGVLYALGDPVRLQVRLAANHELSCCEAL<br>EAQVAKSTLSHHFKVLRRESGVLYCRKEGTQHMNSLRRLADLDERF<br>PGLLNTVLQAIPLKA                |
| A0A2W4WN42 | Shackletoniella antarctica                    | Bacteria>Cyanobacteria>Synechococcales>Oscillatoriales>Shackletoniella                                 | MRSIPHPNCQDIALEGVLYALGDPVRLQVRLAANHELSCSDLD<br>LGVAKSTLSHHFKILREAGVLHCRKQGTQHMNSLRDDLEAAFP<br>GLLDTILQAAQGIKGD                  |
| B8HSU5     | Cyanothece sp. (strain PCC 7425 / ATCC 29141) | Bacteria>Cyanobacteria>Oscillatoriales>Oscillatoriales>Cyanotheceae>Cyanothece>unclassified Cyanothece | MRLIHPDRKDISLAGVLYALGDPVRLQVRLAANHELSCAALDV<br>PAPKSTLSHHFKILREAGVLFCKRKEGTQHLNSLRKDDLEARFPGL<br>LAVVLQATHQPH                   |
| K9WKU2     | Microcoleus sp. PCC 7113                      | Bacteria>Cyanobacteria>Oscillatoriales>Microcoleaceae>Microcoleus>unclassified Microcoleus             | MRLLYHPDPKDISLAGVLYALGDPVRLQVRLAANHELSCAAFD<br>LAIARSTMSHHFKVLRRESGVLYCRKEGTQHLNSLRREDLDALFPG<br>LLEAVLQAAPQSLAVDHTPTPET        |
| A0A1U7JBT6 | Phormidium tenue NIES-30                      | Bacteria>Cyanobacteria>Oscillatoriales>Oscillatoriales>Phormidiumaceae>Phormidium                      | MRPIHPNCQDIALEGVLYALGDPVRLQVRLAANDELSCSDLD<br>LGVAKSTLSHHFKILREAGVLHCRKQGTQHMNSLRDDLEAAFP<br>GLLDSILKAAQTQVER                   |
| A0A2P8VLR4 | filamentous cyanobacterium CCT1               | Bacteria>Cyanobacteria                                                                                 | MRPIYHPDCKDITIEGVLYALGDPVRLQVRLAANDELCSALDLP<br>VAKSTLSHHFKILREAGVITCRKQGTQHLNSLRRLQELQAKFPDLL<br>DTVLRASNGTSPYAPLDRPGNH        |

|            |                                  |                                                                                               |                                                                                                                                      |
|------------|----------------------------------|-----------------------------------------------------------------------------------------------|--------------------------------------------------------------------------------------------------------------------------------------|
| A0A2P8VVL2 | filamentous cyanobacterium CCT1  | Bacteria>Cyanobacteria                                                                        | MRPIHHPNCQDIALEGVLYALGDPVRLEIVQRLASNDELSCSDDL<br>LGVAKSTLSHHFKILREAGVLHCRKQGTQHMNSLRDDLEAAFP<br>GLLDSILKAARAKVES                     |
| A0A2P8WDA8 | filamentous cyanobacterium CCP5  | Bacteria>Cyanobacteria                                                                        | MRPIYHPDCKDITIEGVLYALGDPIRLEIVKRLAQEDEIPCSALDLP<br>VAKSTLSHHFKILREAGVITCRKQGTQHLNSLRQLQELQAKFPDLL<br>DTVLRASNGTSPYAPLDRPGNH          |
| A0A2T2W547 | filamentous cyanobacterium CCP3  | Bacteria>Cyanobacteria                                                                        | MRPIHHPNPQDIALAGVLYALGDPVRLEIVQRLAANDELSCSDDL<br>LGVAKSTLSHHFKILREAGVLHCRKQGTQHMNSLRDDLEAAYP<br>GLLDTILRSAQVSEAKP                    |
| A0A3B8JDY8 | Cyanobacteria bacterium UBA8553  | Bacteria>Cyanobacteria                                                                        | MRLLYHPDKKDISLASVLYALGDPVRLEIVKQLAQKGELS<br>CAALAMPVAKSTLSHHFKVLRESGVLHCRKEGTQHINSLRRQDLDDRFP<br>GLLDTVLQSAMTTDN                     |
| A0A3D1P7C9 | Cyanobacteria bacterium UBA11049 | Bacteria>Cyanobacteria                                                                        | MRLIYHPDRKDISLAGVLYALGDPVRLEIVKCLATKGEQPCAAMY<br>FSIPKSTMSHHFKVLRESGTISCRKQGTQHLNSLRREDLDALFPG<br>LLDAVLQAAGSYLQPSSGDGTD             |
| A0A2S8SU85 | Abditibacterium utsteinense      | Bacteria>Abditibacteriota>Abditibacteria>Abditibacteriales>Abditibacteriaceae>Abditibacterium | MRELHHPSCESLSLPQVLHALSDPIRLCIAAQLDCRGLDPCGTF<br>CESAAKSTMSHHFKVLRRLAGVINQRTEGTS<br>CFNTLRRADLDARFP<br>GLLDAILRASNRW                  |
| A0A4Q3X1T0 | Unclassified bacteria            | Bacteria                                                                                      | MRELHHPSRDSISLPQVLHALSDPIRLCIVAELDNRGDLP<br>CGTF<br>CENAAKSTMSHHFKVLRRLAGVILQRNEGTS<br>CFNTIRRADLDARFP<br>GLLDAIFQAESKNS             |
| A0A4V1ZK08 | Unclassified bacteria            | Bacteria                                                                                      | MRELHHPPRECLELTQVLHALSDPIRLCIVRQLALGEALACGTF<br>CFETAPKSTMSHHFKVLRRLSGVIHQRESEGTS<br>CFNTLRRGDLDARFP<br>GLLDAIVREEVGA<br>CGNSVWEEDSR |



## Supplementary References

- 1 Krissinel, E. & Henrick, K. Inference of macromolecular assemblies from crystalline state. *J Mol Biol* **372**, 774-797, doi:10.1016/j.jmb.2007.05.022 (2007).
- 2 Holm, L. & Rosenstrom, P. Dali server: conservation mapping in 3D. *Nucleic Acids Res* **38**, W545-549, doi:10.1093/nar/gkq366 (2010).
- 3 Mukherjee, D., Datta, A. B. & Chakrabarti, P. Crystal structure of HlyU, the hemolysin gene transcription activator, from *Vibrio cholerae* N16961 and functional implications. *Biochim Biophys Acta* **1844**, 2346-2354, doi:10.1016/j.bbapap.2014.09.020 (2014).
- 4 Ye, J., Kandedgedara, A., Martin, P. & Rosen, B. P. Crystal structure of the *Staphylococcus aureus* pl258 CadC Cd(II)/Pb(II)/Zn(II)-responsive repressor. *J Bacteriol* **187**, 4214-4221, doi:10.1128/JB.187.12.4214-4221.2005 (2005).
- 5 Prabakaran, C., Kandavelu, P., Packianathan, C., Rosen, B. P. & Thiyagarajan, S. Structures of two ArsR As(III)-responsive transcriptional repressors: Implications for the mechanism of derepression. *J Struct Biol* **207**, 209-217, doi:10.1016/j.jsb.2019.05.009 (2019).
- 6 Eicken, C. *et al.* A metal-ligand-mediated intersubunit allosteric switch in related SmtB/ArsR zinc sensor proteins. *J Mol Biol* **333**, 683-695, doi:10.1016/j.jmb.2003.09.007 (2003).
- 7 Emsley, P. & Cowtan, K. Coot: model-building tools for molecular graphics. *Acta Crystallogr D Biol Crystallogr* **60**, 2126-2132, doi:10.1107/S0907444904019158 (2004).
- 8 Lee, S. G., Krishnan, H. B. & Jez, J. M. Structural basis for regulation of rhizobial nodulation and symbiosis gene expression by the regulatory protein NodR. *Proc Natl Acad Sci U S A* **111**, 6509-6514, doi:10.1073/pnas.1402243111 (2014).
- 9 Gerlt, J. A. Genomic Enzymology: Web Tools for Leveraging Protein Family Sequence-Function Space and Genome Context to Discover Novel Functions. *Biochemistry* **56**, 4293-4308, doi:10.1021/acs.biochem.7b00614 (2017).
- 10 Zallot, R., Oberg, N. O. & Gerlt, J. A. 'Democratized' genomic enzymology web tools for functional assignment. *Curr Opin Chem Biol* **47**, 77-85, doi:10.1016/j.cbpa.2018.09.009 (2018).
- 11 Crooks, G. E., Hon, G., Chandonia, J. M. & Brenner, S. E. WebLogo: a sequence logo generator. *Genome Res* **14**, 1188-1190, doi:10.1101/gr.849004 (2004).
- 12 Kumar, S., Stecher, G., Li, M., Knyaz, C. & Tamura, K. MEGA X: Molecular Evolutionary Genetics Analysis across Computing Platforms. *Mol Biol Evol* **35**, 1547-1549, doi:10.1093/molbev/msy096 (2018).
- 13 Stecher, G., Tamura, K. & Kumar, S. Molecular Evolutionary Genetics Analysis (MEGA) for macOS. *Mol Biol Evol* **37**, 1237-1239, doi:10.1093/molbev/msz312 (2020).
- 14 Jones, D. T., Taylor, W. R. & Thornton, J. M. The rapid generation of mutation data matrices from protein sequences. *Comput Appl Biosci* **8**, 275-282, doi:10.1093/bioinformatics/8.3.275 (1992).

- 15 Chakravorty, D. K. *et al.* Solution NMR refinement of a metal ion bound protein using metal ion inclusive restrained molecular dynamics methods. *J Biomol NMR* **56**, 125-137, doi:10.1007/s10858-013-9729-7 (2013).
- 16 Capdevila, D. A. *et al.* Structural basis for persulfide-sensing specificity in a transcriptional regulator. *Nat Chem Biol* **17**, 65-70, doi:10.1038/s41589-020-00671-9 (2021).
- 17 Arunkumar, A. I., Campanello, G. C. & Giedroc, D. P. Solution structure of a paradigm ArsR family zinc sensor in the DNA-bound state. *Proc Natl Acad Sci U S A* **106**, 18177-18182, doi:10.1073/pnas.0905558106 (2009).
- 18 Pedre, B. *et al.* Structural snapshots of OxyR reveal the peroxidatic mechanism of H<sub>2</sub>O<sub>2</sub> sensing. *Proc Natl Acad Sci U S A* **115**, E11623-E11632, doi:10.1073/pnas.1807954115 (2018).
- 19 Ehira, S. & Ohmori, M. The redox-sensing transcriptional regulator RexT controls expression of thioredoxin A2 in the cyanobacterium *Anabaena* sp. strain PCC 7120. *J Biol Chem* **287**, 40433-40440, doi:10.1074/jbc.M112.384206 (2012).
